# Supplementary material for: Identification of a Transcription Factor-microRNA-Gene Coregulation Network in Meningioma through a Bioinformatic Analysis
Source: Biomed Res Int. 2020 Aug 7;2020:6353814. doi: 10.1155/2020/6353814 (PMC7428944; doi:10.1155/2020/6353814)
Supplement: Supplementary 1 — Supplemental Table 1: A total of 235 DEGs identified from three mRNA expression profiles. [file 6353814.f1.xlsx]

## Sheet: Sheet1
gene	logFC	AveExpr	t	P.Value	adj.P.Val	B
PTGDR_5729	2.42048	7.94054	4.86157	4.8384e-06	0.000153228	3.7632
PDGFD_80310	2.4118	8.81318	5.25009	9.88166e-07	4.42782e-05	5.28239
TNNC1_7134	2.3825	7.66656	3.90705	0.000179286	0.00251438	0.341583
SLC47A1_55244	1.98458	10.2835	3.37112	0.00109992	0.0102014	-1.3479
EGFL6_25975	1.94868	8.75779	2.72724	0.007662	0.0417855	-3.1161
ITIH2_3698	1.88006	8.35313	3.49019	0.000746036	0.00753206	-0.988683
C3_718	1.86343	9.89312	5.32352	7.27067e-07	3.48001e-05	5.57655
SLC26A2_1836	1.83618	9.70729	3.27841	0.00147903	0.0127223	-1.62088
MEOX2_4223	1.71966	7.25054	4.4833	2.1354e-05	0.000496922	2.35021
SLIT2_9353	1.61659	9.894	4.20683	6.05495e-05	0.00108669	1.36347
UNC5C_8633	1.6032	6.96688	5.62405	2.0299e-07	1.242e-05	6.80177
JAM2_58494	1.59142	9.33528	5.00503	2.7105e-06	9.84194e-05	4.3166
FGF9_2254	1.59061	7.07465	4.86087	4.85193e-06	0.000153272	3.76054
CLIC3_9022	1.56264	7.29775	3.61901	0.000485439	0.00538543	-0.589442
NMNAT2_23057	1.55149	8.98298	3.69886	0.000370083	0.00440751	-0.336564
THSD4_79875	1.54643	8.75064	4.02917	0.000115887	0.00179675	0.751556
TMEM100_55273	1.48393	7.56561	4.11237	8.56861e-05	0.00143218	1.03588
MEST_4232	1.45042	9.00457	3.59322	0.000529461	0.0057625	-0.670219
OGN_4969	1.42633	9.37088	3.11195	0.00248278	0.0189741	-2.09592
TMEM30B_161291	1.39767	8.6737	3.00867	0.00339292	0.0237918	-2.38065
BMP4_652	1.36263	8.16791	4.31501	4.04541e-05	0.000824481	1.74471
TREM2_54209	1.35542	7.43753	6.38039	7.2289e-09	6.81674e-07	10.0164
SPTLC3_55304	1.32792	6.56399	5.13618	1.58411e-06	6.52013e-05	4.83038
PPM1H_57460	1.29489	7.54577	4.34986	3.54817e-05	0.000747245	1.86885
ITPKB_3707	1.26361	8.69621	4.39741	2.96386e-05	0.000647946	2.0393
TBC1D8_11138	1.26283	8.23919	4.20177	6.16933e-05	0.00110102	1.3458
CDH1_999	1.26209	4.0876	6.28512	1.1098e-08	1.00888e-06	9.60244
CSF1R_1436	1.23968	9.11227	4.31173	4.09557e-05	0.000830685	1.73305
CX3CR1_1524	1.23919	8.45014	3.19607	0.00191527	0.0155252	-1.85833
CACNA2D3_55799	1.22483	6.83077	3.91016	0.000177323	0.00249406	0.351908
BNC2_54796	1.19788	8.65024	4.56922	1.53292e-05	0.000389738	2.665
ADORA2B_136	1.19333	7.8921	4.52391	1.8265e-05	0.000448149	2.49854
JAM3_83700	1.1786	10.2245	3.89437	0.00018751	0.002598	0.29951
FCGBP_8857	1.17484	8.53979	2.51093	0.013805	0.0646792	-3.63969
OLFML2A_169611	1.17205	9.30712	4.05212	0.000106664	0.00169844	0.829603
EYA2_2139	1.16199	8.19479	4.08959	9.31056e-05	0.00153188	0.957626
CXADR_1525	1.15681	7.39419	3.62972	0.00046819	0.00523379	-0.555756
SEMA3B_7869	1.15091	8.49394	4.52844	1.79486e-05	0.000444703	2.51513
COL9A3_1299	1.14789	8.36079	3.14583	0.00223766	0.0175186	-2.00086
FAT4_79633	1.14191	7.89558	2.84497	0.00548539	0.0333179	-2.81575
SPINT2_10653	1.13257	9.04612	3.72653	0.000336581	0.00408161	-0.24799
CEMIP_57214	1.12452	9.46866	2.15127	0.0341014	0.123327	-4.42598
CD9_928	1.12046	9.86513	4.94117	3.51182e-06	0.000118651	4.06913
DSP_1832	1.09749	9.8647	2.70468	0.00815985	0.0437825	-3.17244
PTPRU_10076	1.08858	8.29161	4.68245	9.85177e-06	0.000267139	3.0855
GLB1L2_89944	1.07562	7.22148	4.90374	4.0842e-06	0.000132668	3.92494
FLRT3_23767	1.05056	7.27503	2.44646	0.016347	0.0730931	-3.78848
CRABP2_1382	1.04655	9.12396	2.82816	0.00575689	0.0344922	-2.8593
CTSK_1513	1.04577	9.33619	4.47982	2.16409e-05	0.000501751	2.33754
VAMP8_8673	1.04475	8.70158	3.54894	0.000614017	0.00647639	-0.807945
CYP4B1_1580	1.03393	6.00937	2.621	0.0102736	0.0520516	-3.3779
SLC4A4_8671	1.02158	4.31683	4.80739	6.00821e-06	0.000181193	3.55665
ALPL_249	1.02142	6.86718	2.03158	0.0451107	0.15052	-4.66348
FZD2_2535	1.02004	7.68837	4.46302	2.30799e-05	0.000524528	2.27646
EIF5AP4_NA	1.01675	5.10011	3.35232	0.0011685	0.0106607	-1.40372
CD74_972	1.00446	11.0327	3.08044	0.00273303	0.0203144	-2.18361
TTLL7_79739	-1.00064	4.89202	-6.58451	2.86481e-09	2.96719e-07	10.9108
PHLDA2_7262	-1.003	6.02754	-4.00957	0.000124363	0.00190479	0.685157
GNG11_2791	-1.00561	6.72246	-3.44198	0.000873939	0.00855391	-1.13528
PXDC1_221749	-1.00752	7.69517	-6.06976	2.89975e-08	2.33384e-06	8.6757
SH3GL2_6456	-1.00882	4.69751	-9.07023	2.23703e-14	1.04693e-11	22.3087
PLN_5350	-1.00967	2.07067	-8.06857	2.74833e-12	7.23499e-10	17.6423
PDE2A_5138	-1.01566	6.15026	-6.10852	2.44163e-08	2.0165e-06	8.84154
SPX_80763	-1.01968	5.12076	-6.55537	3.27136e-09	3.2807e-07	10.7825
FHL2_2274	-1.02215	7.1626	-3.71275	0.000352887	0.00424344	-0.292158
ITIH3_3699	-1.02842	5.59406	-6.76413	1.25916e-09	1.44643e-07	11.7058
MYLK_4638	-1.03943	7.68267	-2.70896	0.00806302	0.043392	-3.16176
HIF1A_3091	-1.04043	8.46174	-4.8539	4.98939e-06	0.000156442	3.73388
SLC12A5_57468	-1.04266	4.92678	-7.57778	2.82932e-11	5.25754e-09	15.3816
S100A4_6275	-1.04281	7.37646	-5.06333	2.13663e-06	8.10764e-05	4.54408
GPR183_1880	-1.04343	5.86089	-3.41474	0.000955089	0.00915668	-1.21743
NRN1_51299	-1.04359	7.39464	-2.51387	0.0136978	0.0642725	-3.63281
CD34_947	-1.04912	7.2274	-4.71486	8.67134e-06	0.000242414	3.20702
MGLL_11343	-1.04938	6.99867	-5.40647	5.12874e-07	2.61318e-05	5.91137
ADGRB3_577	-1.05373	4.6992	-7.0648	3.136e-10	4.40295e-08	13.0511
EDIL3_10085	-1.05723	6.00582	-3.34653	0.00119044	0.0107908	-1.42089
NELL2_4753	-1.05725	5.43675	-6.58468	2.86252e-09	2.96719e-07	10.9116
TAGLN3_29114	-1.05865	5.89396	-4.80017	6.18358e-06	0.000186038	3.52921
SYNM_23336	-1.05943	7.28576	-4.20648	6.06294e-05	0.00108669	1.36222
ROBO1_6091	-1.06011	5.87192	-3.98027	0.000138148	0.00205611	0.586336
SLCO4A1_28231	-1.06031	6.00335	-9.95779	3.10114e-16	2.799e-13	26.4566
EMX2_2018	-1.06073	4.99554	-6.08264	2.73886e-08	2.21847e-06	8.73075
SLC20A1_6574	-1.06235	7.1852	-5.62094	2.05719e-07	1.245e-05	6.78892
FILIP1L_11259	-1.06487	5.80036	-6.77789	1.18197e-09	1.37022e-07	11.767
FOSL1_8061	-1.06568	5.98599	-7.69356	1.63608e-11	3.13234e-09	15.9126
PHGDH_26227	-1.06584	6.38078	-5.86275	7.21265e-08	5.17836e-06	7.79752
PLLP_51090	-1.0678	6.44425	-5.67505	1.62975e-07	1.01948e-05	7.01291
SATB1_6304	-1.07047	6.79828	-6.15659	1.97163e-08	1.67205e-06	9.0478
EIF1B_10289	-1.07068	7.30258	-6.95757	5.15824e-10	6.78953e-08	12.5694
UAP1_6675	-1.07175	7.13705	-4.79073	6.42026e-06	0.000191758	3.49341
CAMK2N1_55450	-1.0838	7.78694	-3.44017	0.000879112	0.00859123	-1.14074
SCN2A_6326	-1.08787	5.22337	-7.45309	5.09438e-11	8.58302e-09	14.8116
RASL12_51285	-1.08819	5.60814	-6.86809	7.8013e-10	9.65316e-08	12.169
BEX1_55859	-1.09081	6.21364	-3.9513	0.000153209	0.00223551	0.489119
NAMPTP1_NA	-1.0923	5.36394	-4.23694	5.4153e-05	0.00100041	1.46893
SCN3A_6328	-1.09502	4.096	-9.61141	1.64541e-15	1.22302e-12	24.8392
MYC_4609	-1.09618	8.01226	-3.58225	0.000549328	0.00593274	-0.704477
DDIT4_54541	-1.09972	8.83477	-3.24836	0.00162615	0.0136804	-1.70809
SEMA3G_56920	-1.10175	5.51338	-8.16147	1.7632e-12	5.18133e-10	18.0728
B3GAT1_27087	-1.11062	6.25866	-6.91502	6.2808e-10	8.01659e-08	12.3788
NAV2_89797	-1.1113	6.55866	-4.61032	1.30651e-05	0.000341097	2.81692
RBFOX1_54715	-1.11446	4.98436	-8.81235	7.75012e-14	3.15905e-11	21.1036
PPBP_5473	-1.11908	4.96854	-4.46923	2.25371e-05	0.00051684	2.29904
SCG2_7857	-1.11997	5.17487	-2.97578	0.00374219	0.0254638	-2.46968
CA2_760	-1.12364	5.39641	-4.54184	1.70432e-05	0.000425609	2.5643
DAAM2_23500	-1.12857	6.80799	-5.09873	1.84802e-06	7.32025e-05	4.6829
MMRN1_22915	-1.13157	4.26791	-7.43496	5.54843e-11	9.22499e-09	14.7289
MCTP1_79772	-1.13186	4.89698	-6.47577	4.69619e-09	4.60139e-07	10.4331
MLLT11_10962	-1.13823	7.74008	-4.42911	2.62715e-05	0.00058548	2.15361
CNTN1_1272	-1.13842	6.33641	-4.39063	3.0411e-05	0.000660263	2.01492
AOC3_8639	-1.14079	3.17012	-6.95148	5.30576e-10	6.91171e-08	12.5421
MT1E_4493	-1.14395	8.60747	-4.13796	7.80289e-05	0.00134146	1.12413
PLK2_10769	-1.14639	5.55338	-5.39517	5.37903e-07	2.70794e-05	5.86564
GADD45A_1647	-1.15003	7.41846	-5.11605	1.72099e-06	6.92561e-05	4.75106
GABRB1_2560	-1.15078	4.19017	-9.17251	1.36611e-14	6.90487e-12	22.787
COX7A1_1346	-1.15401	7.76547	-4.10164	8.91047e-05	0.00147759	0.999009
BASP1_10409	-1.15688	8.16613	-3.36515	0.00112128	0.0103344	-1.36565
NDRG4_65009	-1.16134	6.35431	-4.95083	3.37721e-06	0.000115341	4.10646
VEGFC_7424	-1.16706	5.41047	-11.4656	2.31059e-19	7.29917e-16	33.4249
FBXO2_26232	-1.16862	6.10038	-6.21169	1.54193e-08	1.35305e-06	9.285
GGT5_2687	-1.17239	7.10157	-6.18511	1.73619e-08	1.48233e-06	9.1705
EFHD1_80303	-1.17243	7.38343	-4.87802	4.52931e-06	0.000145629	3.8262
ADM_133	-1.17302	7.77307	-2.95552	0.00397348	0.0266502	-2.52411
MPZ_4359	-1.1745	6.60041	-5.57017	2.55739e-07	1.48235e-05	6.57971
FHOD3_80206	-1.17754	5.72599	-7.81328	9.27069e-12	2.01973e-09	16.4633
ETNPPL_64850	-1.18784	4.17831	-6.86623	7.86859e-10	9.65316e-08	12.1607
MATN4_8785	-1.18891	5.65704	-5.6761	1.62239e-07	1.01948e-05	7.01726
CCNL1_57018	-1.19058	8.11738	-4.71934	8.51964e-06	0.000239663	3.22382
SCG3_29106	-1.2094	3.74308	-8.0886	2.49761e-12	6.86084e-10	17.7351
HSPB6_126393	-1.21392	6.65316	-4.56113	1.58173e-05	0.000398141	2.63522
PDLIM1_9124	-1.22165	7.75179	-3.34029	0.00121447	0.0109693	-1.43933
CHL1_10752	-1.22535	5.1527	-5.57719	2.48175e-07	1.45182e-05	6.60857
SLC7A11_23657	-1.23038	2.34954	-5.47047	3.9114e-07	2.13959e-05	6.1715
AK5_26289	-1.23937	5.63403	-6.2276	1.43602e-08	1.28691e-06	9.35369
TIMP4_7079	-1.24219	6.13064	-6.73102	1.46588e-09	1.65382e-07	11.5587
EHD3_30845	-1.24421	5.73812	-9.2717	8.46745e-15	4.86339e-12	23.2509
DPP6_1804	-1.24813	5.73249	-6.47571	4.69753e-09	4.60139e-07	10.4328
S100A9_6280	-1.24967	5.59589	-4.38903	3.05958e-05	0.000663136	2.00918
S1PR1_1901	-1.25532	5.52661	-7.77653	1.10387e-11	2.32474e-09	16.294
S100A12_6283	-1.25936	4.85414	-5.20623	1.18576e-06	5.14889e-05	5.10773
CLDN5_7122	-1.26143	6.40178	-8.41435	5.25105e-13	1.74611e-10	19.2477
PNP_4860	-1.26204	6.78748	-5.12663	1.64772e-06	6.69472e-05	4.79269
EPS8_2059	-1.26257	6.4849	-4.81467	5.83634e-06	0.000177279	3.58432
DUSP2_1844	-1.26588	6.30011	-5.7138	1.37854e-07	8.93291e-06	7.17395
LRRC32_2615	-1.26881	6.3766	-12.0707	1.34364e-20	8.48911e-17	36.1703
SNAP91_9892	-1.27492	5.34629	-7.94906	4.85939e-12	1.20399e-09	17.0896
TSPAN8_7103	-1.28666	4.50346	-8.11002	2.25481e-12	6.33152e-10	17.8343
CDH19_28513	-1.2889	4.93553	-6.81051	1.01724e-09	1.22417e-07	11.9122
MT1G_4495	-1.29126	7.97326	-6.97359	4.7891e-10	6.43777e-08	12.6412
GCH1_2643	-1.30202	5.07124	-5.28107	8.68367e-07	4.04896e-05	5.40627
RBP4_5950	-1.31269	6.32963	-2.54103	0.0127441	0.0607191	-3.56904
MYL9_10398	-1.32041	9.13872	-5.19885	1.22261e-06	5.23693e-05	5.07842
AMIGO2_347902	-1.34215	4.92734	-13.0555	1.41398e-22	1.7867e-18	40.5548
AGT_183	-1.35148	6.65541	-5.25778	9.56993e-07	4.30341e-05	5.31311
GPC5_2262	-1.35275	4.41931	-9.84093	5.44395e-16	4.29936e-13	25.9113
MYH11_4629	-1.35372	3.24271	-7.03837	3.54586e-10	4.92368e-08	12.9322
PDZRN4_29951	-1.35419	4.46877	-6.20467	1.591e-08	1.38647e-06	9.25477
MT2A_4502	-1.35836	6.62507	-6.21507	1.51879e-08	1.35083e-06	9.2996
PTPRK_5796	-1.36699	6.0975	-7.75225	1.23868e-11	2.5245e-09	16.1823
GEM_2669	-1.37274	6.61693	-4.28077	4.59917e-05	0.000887579	1.62335
SV2B_9899	-1.38158	5.61383	-8.39174	5.85271e-13	1.89628e-10	19.1425
KDM5D_8284	-1.3904	5.63129	-3.62733	0.000471992	0.00526212	-0.563288
SERPINA3_12	-1.39295	7.20905	-3.8127	0.000249758	0.00322035	0.0309289
EMCN_51705	-1.39411	5.60661	-7.18419	1.79787e-10	2.64162e-08	13.5899
TRIB1_10221	-1.39656	7.06	-4.11364	8.52892e-05	0.00142744	1.04025
DNM1_1759	-1.40987	5.79233	-5.94212	5.09335e-08	3.80826e-06	8.13267
RGS2_5997	-1.4229	7.69707	-3.52409	0.000666917	0.00691885	-0.884683
NRGN_4900	-1.42853	6.27687	-4.50693	1.94998e-05	0.00046755	2.43643
HSPA2_3306	-1.43163	6.83748	-4.70894	8.87631e-06	0.000246508	3.18477
ANGPTL7_10218	-1.44157	6.15406	-4.04456	0.000109623	0.00172934	0.803846
TAC1_6863	-1.44987	3.93534	-6.55856	3.22419e-09	3.25927e-07	10.7966
CYP26B1_56603	-1.45371	5.35219	-9.12389	1.72704e-14	8.39341e-12	22.5597
RFTN1_23180	-1.45439	7.16867	-7.69483	1.62625e-11	3.13234e-09	15.9184
TAGLN_6876	-1.45983	9.64849	-4.22003	5.76606e-05	0.00104534	1.40964
RND1_27289	-1.46265	5.31212	-8.75978	9.98224e-14	3.94172e-11	20.8581
MTHFD2_10797	-1.47717	3.7371	-7.33366	8.93086e-11	1.37622e-08	14.2677
SLC12A1_6557	-1.4867	4.04659	-5.38912	5.51816e-07	2.75602e-05	5.84114
LUM_4060	-1.49997	5.84185	-2.93437	0.0042291	0.0278473	-2.58063
SUSD5_26032	-1.50355	4.88053	-10.9599	2.54741e-18	3.21891e-15	31.1051
CASQ2_845	-1.50561	5.7317	-8.33386	7.72476e-13	2.44025e-10	18.8733
SLC13A4_26266	-1.51384	6.76145	-4.4192	2.72817e-05	0.000602678	2.11784
CH25H_9023	-1.5162	6.4802	-4.04059	0.000111206	0.00174994	0.790352
THBS2_7058	-1.52515	7.84466	-4.23202	5.51523e-05	0.00100709	1.45166
RERGL_79785	-1.52971	4.20547	-9.41061	4.33309e-15	2.864e-12	23.9005
INA_9118	-1.53281	5.85884	-10.4562	2.82899e-17	2.97892e-14	28.7757
SPOCK1_6695	-1.53666	5.61145	-6.12688	2.25032e-08	1.88312e-06	8.92025
JCHAIN_3512	-1.54973	4.39802	-6.21361	1.52872e-08	1.35083e-06	9.29331
HOMER1_9456	-1.55849	4.83444	-11.0481	1.6736e-18	2.36588e-15	31.5114
APOD_347	-1.57142	9.30843	-2.87909	0.00497022	0.0311526	-2.72673
SERPINI1_5274	-1.58125	5.1852	-8.01105	3.61637e-12	9.13929e-10	17.3761
MAL_4118	-1.59787	6.58464	-7.50007	4.08283e-11	7.06722e-09	15.0261
S100B_6285	-1.60175	6.39276	-3.61603	0.000490332	0.00542068	-0.598778
VWF_7450	-1.60388	7.08797	-6.56484	3.13333e-09	3.19296e-07	10.8242
RGCC_28984	-1.60511	7.15643	-5.28561	8.52055e-07	4.01512e-05	5.42445
ASPN_54829	-1.60957	6.09043	-2.86521	0.00517409	0.0320332	-2.76304
CCL19_6363	-1.61295	5.78457	-9.40125	4.53307e-15	2.864e-12	23.8567
SLC7A5_8140	-1.63393	7.0324	-5.29734	8.11277e-07	3.83944e-05	5.47146
SGCE_8910	-1.63883	6.75272	-4.68262	9.84517e-06	0.000267139	3.08614
PTX3_5806	-1.64385	4.51582	-6.11681	2.35342e-08	1.95644e-06	8.87703
IFI44L_10964	-1.6462	5.8891	-6.06737	2.9306e-08	2.34374e-06	8.66549
PLS3_5358	-1.64962	8.05421	-4.75424	7.42129e-06	0.000215996	3.35531
DUSP5_1847	-1.65232	6.27597	-4.53727	1.73468e-05	0.000431485	2.54753
CHRDL1_91851	-1.67601	6.52732	-5.18567	1.29126e-06	5.45699e-05	5.02609
FABP4_2167	-1.70526	5.18218	-6.7865	1.13609e-09	1.32923e-07	11.8053
GRIA2_2891	-1.70887	4.87936	-4.0166	0.000121254	0.0018667	0.708968
PLAT_5327	-1.71883	6.86494	-6.98274	4.59031e-10	6.27311e-08	12.6823
SLC6A1_6529	-1.7326	5.82209	-4.95015	3.38648e-06	0.000115341	4.10384
ALDOC_230	-1.73266	7.17568	-7.58288	2.76197e-11	5.20899e-09	15.405
ACKR1_2532	-1.74148	6.38236	-11.0466	1.6851e-18	2.36588e-15	31.5047
ADAMTS9_56999	-1.75473	6.67621	-8.89948	5.09389e-14	2.21953e-11	21.5106
ITGA8_8516	-1.78417	5.9928	-4.87119	4.65519e-06	0.000148919	3.80004
PCP4_5121	-1.84554	5.01622	-11.1192	1.19339e-18	2.15423e-15	31.8383
ATF3_467	-1.86154	6.7693	-4.29178	4.41356e-05	0.000867384	1.66231
ADGRL4_64123	-1.86988	5.32179	-8.08202	2.5774e-12	6.92937e-10	17.7046
RPS4Y1_6192	-1.87557	6.59204	-3.02314	0.00324902	0.0230831	-2.34122
S100A8_6279	-1.97505	6.33933	-4.82316	5.64184e-06	0.000172616	3.61665
MT1M_4499	-1.97572	6.32866	-5.41182	5.01409e-07	2.57553e-05	5.93307
CCL2_6347	-2.01916	7.64387	-4.32334	3.92081e-05	0.000808212	1.77431
PMP2_5375	-2.04162	5.29801	-5.93658	5.21878e-08	3.8564e-06	8.10923
CRISPLD2_83716	-2.07077	6.83652	-5.85524	7.45337e-08	5.32095e-06	7.7659
SRPX_8406	-2.07508	6.92898	-4.6037	1.34067e-05	0.000347145	2.79238
NFIL3_4783	-2.0857	6.4835	-8.53362	2.96186e-13	1.03961e-10	19.8031
SELE_6401	-2.12816	4.70865	-7.34654	8.40701e-11	1.32789e-08	14.3262
RCAN2_10231	-2.13667	7.23581	-7.70571	1.54451e-11	3.04945e-09	15.9684
HILPDA_29923	-2.14681	7.2307	-10.7733	6.20228e-18	7.12473e-15	30.2444
NEFM_4741	-2.15475	5.213	-8.86303	6.07175e-14	2.55742e-11	21.3403
ACTA2_59	-2.15581	8.85901	-7.77236	1.12591e-11	2.3323e-09	16.2749
FHL5_9457	-2.28427	4.97991	-9.55868	2.12173e-15	1.48946e-12	24.5928
TTR_7276	-2.29209	6.52222	-11.1674	9.49166e-19	1.99894e-15	32.0596
SCRG1_11341	-2.32798	5.00562	-9.189	1.26172e-14	6.90487e-12	22.8641
PTGS2_5743	-2.33541	5.0265	-11.5839	1.32155e-19	5.56636e-16	33.9644
CNN1_1264	-2.39576	5.68796	-11.3249	4.49587e-19	1.1362e-15	32.7818
IL6_3569	-2.68599	5.67662	-7.48164	4.45346e-11	7.60458e-09	14.9419
CXCL2_2920	-2.81249	5.39076	-9.9242	3.64555e-16	3.07101e-13	26.2999
ADAMTS1_9510	-3.08702	6.92607	-10.312	5.64979e-17	5.49159e-14	28.1059
