# Supplementary material for: Identification of a Transcription Factor-microRNA-Gene Coregulation Network in Meningioma through a Bioinformatic Analysis
Source: Biomed Res Int. 2020 Aug 7;2020:6353814. doi: 10.1155/2020/6353814 (PMC7428944; doi:10.1155/2020/6353814)
Supplement: Supplementary 2 — Supplemental Table 2: A total of 272 DEMs were identified from GSE88721. [file 6353814.f2.xlsx]

## Sheet: miRNA-geo2r
ID	Accession	adj.P.Val	P.Value	t	B	logFC	miRNA_ID	SPOT_ID
20500798	MIMAT0000461	1.23e-07	7.4e-11	14.4061	14.8888	4.14913	hsa-miR-195-5p	up
20500727	MIMAT0004590	0.00462	9.6e-05	5.08651	1.3554	4.07632	hsa-miR-122-3p	up
20500769	MIMAT0000445	1.23e-07	6.63e-11	14.5087	14.9871	3.90174	hsa-miR-126-3p	up
20500791	MIMAT0000457	2.04e-05	6.73e-08	9.11849	8.5156	3.65935	hsa-miR-188-5p	up
20525747	MIMAT0027686	0.000678	7.85e-06	6.34837	3.8406	3.6376	hsa-miR-6893-5p	up
20500796	MIMAT0000459	0.000143	1.08e-06	7.43562	5.8056	3.58699	hsa-miR-193a-3p	up
20501278	MIMAT0000752	3.38e-05	1.42e-07	8.64214	7.7879	3.44453	hsa-miR-328-3p	up
20525559	MIMAT0027498	0.000101	7.13e-07	7.67154	6.2093	3.41668	hsa-miR-6799-5p	up
20517675	MIMAT0016847	5.36e-08	8.35e-12	16.5562	16.7941	3.33327	hsa-miR-378c	up
20525384	MIMAT0025845	0.00223	3.65e-05	5.56218	2.3158	3.2184	hsa-miR-6716-3p	up
20518930	MIMAT0019068	0.00498	0.000111	5.01476	1.2084	3.17071	hsa-miR-4529-3p	up
20500423	MIMAT0004550	9.22e-05	6.23e-07	7.75015	6.3421	3.1462	hsa-miR-30c-2-3p	up
20529795	MIMAT0031012	0.00558	0.000135	4.92188	1.0173	3.12191	hsa-miR-8085	up
20506779	MIMAT0005586	4.61e-05	2.29e-07	8.34922	7.3253	3.11964	hsa-miR-1231	up
20500778	MIMAT0000449	2.06e-05	7.12e-08	9.08216	8.4611	3.11131	hsa-miR-146a-5p	up
20500189	MIMAT0004515	0.000103	7.39e-07	7.65087	6.1743	3.10161	hsa-miR-29b-2-5p	up
20504378	MIMAT0003297	0.000176	1.46e-06	7.26418	5.5071	3.09902	hsa-miR-628-3p	up
20504581	MIMAT0003887	6.97e-06	1.78e-08	10.0096	9.7988	3.09859	hsa-miR-769-3p	up
20515573	MIMAT0015028	0.00115	1.51e-05	6.00681	3.1884	3.08356	hsa-miR-3154	up
20519570	MIMAT0019849	7.51e-07	6.76e-10	12.4757	12.8798	3.04359	hsa-miR-4728-5p	up
20528493	MIMAT0029782	2.99e-06	4.05e-09	11.0742	11.2081	2.98934	hsa-miR-7641	up
20525609	MIMAT0027548	9.65e-06	2.61e-08	9.7475	9.4316	2.95886	hsa-miR-6824-5p	up
20518788	MIMAT0018932	5.32e-06	1.08e-08	10.3615	10.2789	2.94539	hsa-miR-378f	up
20519554	MIMAT0019835	0.000788	9.47e-06	6.25008	3.6546	2.92896	hsa-miR-4721	up
20500154	MIMAT0000083	0.00231	3.85e-05	5.53493	2.2615	2.90371	hsa-miR-26b-5p	up
20504404	MIMAT0003320	0.0169	0.000632	4.19149	-0.5082	2.85646	hsa-miR-650	up
20500432	MIMAT0000250	0.00239	4.09e-05	5.50552	2.2028	2.83287	hsa-miR-139-5p	up
20500174	MIMAT0004509	0.00542	0.00013	4.94013	1.0549	2.8234	hsa-miR-93-3p	up
20517717	MIMAT0016889	0.00328	6.27e-05	5.29467	1.7789	2.82309	hsa-miR-4327	up
20506817	MIMAT0005879	0.00102	1.29e-05	6.09132	3.3513	2.81956	hsa-miR-1289	up
20525635	MIMAT0027574	0.000142	1.04e-06	7.45288	5.8354	2.7956	hsa-miR-6836-5p	up
20503809	MIMAT0002820	0.00231	3.83e-05	5.53807	2.2678	2.79429	hsa-miR-497-5p	up
20521810	MIMAT0022271	0.00127	1.74e-05	5.93523	3.0497	2.76184	hsa-miR-664b-5p	up
20525438	MIMAT0027377	0.00182	2.79e-05	5.69703	2.5832	2.72055	hsa-miR-6738-5p	up
20500421	MIMAT0000243	0.00151	2.13e-05	5.83287	2.8501	2.67814	hsa-miR-148a-3p	up
20517686	MIMAT0016858	0.000796	9.69e-06	6.23786	3.6314	2.64812	hsa-miR-4306	up
20525673	MIMAT0027612	0.216	0.038	2.25225	-4.436	2.63948	hsa-miR-6856-5p	up
20501300	MIMAT0000765	0.002	3.17e-05	5.63286	2.4562	2.62478	hsa-miR-335-5p	up
20500722	MIMAT0004588	0.000659	7.48e-06	6.37375	3.8884	2.62391	hsa-miR-27b-5p	up
20501158	MIMAT0004672	0.00212	3.43e-05	5.59257	2.3763	2.61734	hsa-miR-106b-3p	up
20536670	MI0016758	0.00063	7e-06	6.40849	3.9537	2.60731	hsa-mir-4421	up
20500751	MIMAT0004599	0.00282	4.95e-05	5.4109	2.0132	2.59938	hsa-miR-143-5p	up
20506896	MIMAT0005948	5.32e-06	8.64e-09	10.5188	10.4889	2.56578	hsa-miR-664a-5p	up
20503100	MIMAT0004761	3.98e-05	1.82e-07	8.49066	7.5501	2.53519	hsa-miR-483-5p	up
20525613	MIMAT0027552	0.00462	9.71e-05	5.08118	1.3445	2.52613	hsa-miR-6826-5p	up
20500743	MIMAT0000430	0.0797	0.00666	3.09546	-2.8016	2.52176	hsa-miR-138-5p	up
20519438	MIMAT0019720	0.0755	0.00618	3.13098	-2.7289	2.50844	hsa-miR-4654	up
20529788	MIMAT0031005	0.0208	0.000825	4.06774	-0.7691	2.4899	hsa-miR-8078	up
20501312	MIMAT0000772	5.32e-06	1.14e-08	10.3202	10.2233	2.472	hsa-miR-345-5p	up
20506815	MIMAT0005878	0.00282	5e-05	5.40575	2.0029	2.46708	hsa-miR-1287-5p	up
20500188	MIMAT0000100	0.00157	2.24e-05	5.80673	2.799	2.45785	hsa-miR-29b-3p	up
20525648	MIMAT0027587	0.0169	0.00063	4.19341	-0.5041	2.4526	hsa-miR-6842-3p	up
20504569	MIMAT0005796	8.1e-05	5.23e-07	7.85276	6.5141	2.44789	hsa-miR-1271-5p	up
20501036	MIMAT0000617	0.122	0.0142	2.7382	-3.5183	2.44603	hsa-miR-200c-3p	up
20506006	MIMAT0022938	1.02e-05	2.91e-08	9.67314	9.3259	2.44416	hsa-miR-937-5p	up
20525513	MIMAT0027452	0.0059	0.00015	4.87256	0.9155	2.44205	hsa-miR-6776-5p	up
20518426	MIMAT0018179	0.0109	0.000328	4.49909	0.1383	2.43007	hsa-miR-3907	up
20502237	MIMAT0001413	5.14e-05	2.78e-07	8.23124	7.1356	2.42415	hsa-miR-20b-5p	up
20518621	MIMAT0018349	0.036	0.00181	3.70176	-1.5409	2.39534	hsa-miR-3934-5p	up
20504293	MIMAT0003235	0.174	0.0261	2.45607	-4.073	2.39492	hsa-miR-570-3p	up
20500465	MIMAT0000267	2.7e-05	1.01e-07	8.8566	8.1192	2.37621	hsa-miR-210-3p	up
20525442	MIMAT0027381	0.0528	0.00346	3.40107	-2.1708	2.36211	hsa-miR-6740-5p	up
20519595	MIMAT0019874	0.00104	1.32e-05	6.07605	3.3219	2.35823	hsa-miR-4743-5p	up
20520332	MIMAT0021085	0.0104	0.000302	4.53805	0.2198	2.35819	hsa-miR-5093	up
20519658	MIMAT0019935	0.0423	0.00234	3.58323	-1.7899	2.35175	hsa-miR-4777-3p	up
20529799	MIMAT0031016	1.07e-05	3.22e-08	9.60615	9.2301	2.34872	hsa-miR-8089	up
20525589	MIMAT0027528	0.0807	0.00688	3.08025	-2.8326	2.34253	hsa-miR-6814-5p	up
20506837	MIMAT0005898	1.26e-05	3.98e-08	9.46313	9.0236	2.32362	hsa-miR-1246	up
20525446	MIMAT0027385	0.0139	0.000492	4.30852	-0.2618	2.31311	hsa-miR-6742-5p	up
20500478	MIMAT0000275	0.00571	0.000142	4.89621	0.9643	2.30389	hsa-miR-218-5p	up
20518843	MIMAT0018985	5.32e-06	1.09e-08	10.3551	10.2703	2.29942	hsa-miR-3135b	up
20525713	MIMAT0027652	0.0125	0.0004	4.40585	-0.0572	2.27459	hsa-miR-6876-5p	up
20523007	MIMAT0023700	3.98e-05	1.85e-07	8.4779	7.5299	2.25173	hsa-miR-6075	up
20500385	MIMAT0000222	0.00521	0.000117	4.98932	1.1561	2.24987	hsa-miR-192-5p	up
20504392	MIMAT0003309	0.00596	0.000153	4.86201	0.8937	2.24861	hsa-miR-639	up
20525658	MIMAT0027597	0.0275	0.0012	3.89459	-1.1345	2.24098	hsa-miR-6848-3p	up
20525619	MIMAT0027558	0.000535	5.71e-06	6.51672	4.156	2.23027	hsa-miR-6829-5p	up
20500163	MIMAT0000088	6.75e-05	4.05e-07	8.00372	6.7644	2.22362	hsa-miR-30a-3p	up
20501182	MIMAT0000692	0.0123	0.000387	4.42215	-0.023	2.21823	hsa-miR-30e-5p	up
20518625	MIMAT0018352	0.00107	1.38e-05	6.05479	3.281	2.2173	hsa-miR-3937	up
20534526	MI0000286	0.0373	0.00193	3.67292	-1.6015	2.21445	hsa-mir-210	up
20519681	MIMAT0019958	0.0293	0.00134	3.84161	-1.2462	2.21319	hsa-miR-4788	up
20500782	MIMAT0000451	0.0298	0.00141	3.81797	-1.2961	2.21207	hsa-miR-150-5p	up
20517690	MIMAT0016862	0.0197	0.000766	4.10198	-0.6969	2.20424	hsa-miR-4310	up
20529770	MIMAT0030987	0.0146	0.000521	4.28245	-0.3166	2.1996	hsa-miR-8060	up
20503786	MIMAT0002805	0.0652	0.00481	3.24858	-2.4871	2.18696	hsa-miR-489-3p	up
20517706	MIMAT0016878	0.215	0.0378	2.25504	-4.431	2.18018	hsa-miR-4257	up
20519461	MIMAT0019743	0.0126	0.00041	4.39481	-0.0804	2.17912	hsa-miR-4667-5p	up
20504325	MIMAT0003257	0.151	0.0197	2.57961	-3.8264	2.1733	hsa-miR-550a-3p	up
20500767	MIMAT0004603	0.023	0.000957	3.99857	-0.9151	2.17055	hsa-miR-125b-2-3p	up
20500758	MIMAT0000438	6.63e-06	1.59e-08	10.0859	9.9041	2.17026	hsa-miR-152-3p	up
20506823	MIMAT0005885	0.0993	0.00966	2.9205	-3.156	2.16321	hsa-miR-1295a	up
20505794	MIMAT0004951	0.000101	7.02e-07	7.68104	6.2254	2.14977	hsa-miR-887-3p	up
20536823	MI0016910	0.0293	0.00136	3.8368	-1.2564	2.1408	hsa-mir-4539	up
20519671	MIMAT0019948	0.0605	0.00428	3.30288	-2.3748	2.13027	hsa-miR-4784	up
20529132	MIMAT0030415	0.002	3.13e-05	5.6382	2.4668	2.12715	hsa-miR-1273h-5p	up
20515624	MIMAT0015070	0.0125	0.0004	4.40619	-0.0565	2.12467	hsa-miR-3188	up
20503105	MIMAT0002177	0.00984	0.00028	4.57348	0.2939	2.11792	hsa-miR-486-5p	up
20503875	MIMAT0004773	0.0431	0.00239	3.57349	-1.8103	2.11781	hsa-miR-500a-5p	up
20501279	MIMAT0004694	0.000338	3.2e-06	6.82849	4.7294	2.11729	hsa-miR-342-5p	up
20525430	MIMAT0027369	0.0207	0.000817	4.07203	-0.7601	2.11054	hsa-miR-6734-5p	up
20525487	MIMAT0027426	0.00059	6.38e-06	6.45781	4.0461	2.06489	hsa-miR-6763-5p	up
20505799	MIMAT0004955	0.0187	0.000711	4.1367	-0.6237	2.05656	hsa-miR-374b-5p	up
20501281	MIMAT0004695	0.12	0.0135	2.75987	-3.4757	2.05597	hsa-miR-337-5p	up
20501160	MIMAT0000681	0.000855	1.05e-05	6.19438	3.5486	2.05242	hsa-miR-29c-3p	up
20525523	MIMAT0027462	0.0269	0.00116	3.90968	-1.1027	2.04634	hsa-miR-6781-5p	up
20500445	MIMAT0004558	0.00984	0.000281	4.57307	0.293	2.04499	hsa-miR-181a-2-3p	up
20518937	MIMAT0019075	0.00705	0.000188	4.76237	0.6873	2.03536	hsa-miR-4535	up
20500757	MIMAT0026479	0.0918	0.00859	2.97609	-3.044	2.03444	hsa-miR-152-5p	up
20515623	MIMAT0015069	0.0208	0.000833	4.06299	-0.7792	2.03427	hsa-miR-3187-3p	up
20525577	MIMAT0027516	0.000157	1.2e-06	7.37101	5.6936	2.01591	hsa-miR-6808-5p	up
20525587	MIMAT0027526	0.0309	0.00147	3.79869	-1.3367	1.99106	hsa-miR-6813-5p	up
20500126	MIMAT0000068	0.0287	0.0013	3.85542	-1.2171	1.98299	hsa-miR-15a-5p	up
20517817	MIMAT0017987	0.0646	0.00475	3.25441	-2.475	1.98109	hsa-miR-3610	up
20501291	MIMAT0000759	0.05	0.00315	3.44532	-2.0785	1.97429	hsa-miR-148b-3p	up
20526882	MIMAT0028230	0.0582	0.00404	3.32895	-2.3207	1.97061	hsa-miR-7160-5p	up
20525749	MIMAT0027688	0.00486	0.000106	5.03969	1.2595	1.95729	hsa-miR-6894-5p	up
20518865	MIMAT0019006	0.0197	0.000766	4.10229	-0.6963	1.95063	hsa-miR-4478	up
20506771	MIMAT0022941	6.22e-05	3.55e-07	8.08249	6.8938	1.9425	hsa-miR-1227-5p	up
20501295	MIMAT0000762	0.000726	8.62e-06	6.2992	3.7477	1.93432	hsa-miR-324-3p	up
20525575	MIMAT0027514	0.129	0.0152	2.70505	-3.5833	1.92368	hsa-miR-6807-5p	up
20504431	MIMAT0003338	0.109	0.0115	2.83641	-3.3241	1.91994	hsa-miR-660-5p	up
20501293	MIMAT0000760	0.00773	0.000209	4.71305	0.5848	1.91781	hsa-miR-331-3p	up
20500488	MIMAT0000280	0.00463	9.89e-05	5.07243	1.3266	1.91493	hsa-miR-223-3p	up
20535795	MI0006313	0.0058	0.000146	4.88563	0.9425	1.9097	hsa-mir-1226	up
20501294	MIMAT0000761	6.3e-05	3.69e-07	8.05967	6.8564	1.90471	hsa-miR-324-5p	up
20504552	MIMAT0003880	5.14e-05	2.78e-07	8.23048	7.1344	1.89694	hsa-miR-671-5p	up
20518782	MIMAT0018925	3.98e-05	1.73e-07	8.51978	7.5961	1.89588	hsa-miR-1268b	up
20523017	MIMAT0023710	2.48e-05	8.92e-08	8.93715	8.2421	1.89357	hsa-miR-6085	up
20503907	MIMAT0002888	8.36e-05	5.53e-07	7.8207	6.4605	1.88102	hsa-miR-532-5p	up
20506795	MIMAT0005865	0.0106	0.000314	4.5205	0.1831	1.87994	hsa-miR-1202	up
20501299	MIMAT0004702	0.000468	4.78e-06	6.61179	4.3323	1.86833	hsa-miR-339-3p	up
20517832	MIMAT0018000	0.0476	0.00286	3.49023	-1.9847	1.86552	hsa-miR-23c	up
20535119	MI0001735	0.00108	1.42e-05	6.04105	3.2545	1.86516	hsa-mir-409	up
20537482	MI0022584	0.0148	0.000537	4.26813	-0.3467	1.86227	hsa-mir-6739	up
20517814	MIMAT0017984	0.155	0.0207	2.55512	-3.8733	1.84932	hsa-miR-3607-5p	up
20504364	MIMAT0026622	3.98e-05	1.91e-07	8.45815	7.4987	1.84622	hsa-miR-619-5p	up
20506714	MIMAT0005827	0.0137	0.000476	4.32453	-0.2281	1.84444	hsa-miR-1182	up
20505965	MIMAT0004975	0.236	0.0447	2.16988	-4.5827	1.84324	hsa-miR-509-3-5p	up
20500741	MIMAT0004595	0.0996	0.00974	2.91644	-3.1641	1.84311	hsa-miR-135a-3p	up
20505801	MIMAT0004957	0.0099	0.000284	4.56776	0.282	1.84141	hsa-miR-760	up
20518940	MIMAT0019077	0.000884	1.1e-05	6.17094	3.5038	1.83946	hsa-miR-1587	up
20525551	MIMAT0027490	0.0127	0.000415	4.38844	-0.0938	1.83317	hsa-miR-6795-5p	up
20515641	MIMAT0015082	0.0375	0.00195	3.6681	-1.6117	1.82901	hsa-miR-3197	up
20506819	MIMAT0005881	0.188	0.0299	2.37274	-4.2162	1.82225	hsa-miR-1291	up
20519592	MIMAT0019871	0.000182	1.53e-06	7.23712	5.4596	1.82037	hsa-miR-4741	up
20503811	MIMAT0002821	0.0526	0.00337	3.41424	-2.1433	1.81219	hsa-miR-181d-5p	up
20525453	MIMAT0027392	0.000337	3.09e-06	6.84736	4.7636	1.80818	hsa-miR-6746-5p	up
20525472	MIMAT0027411	0.0807	0.00689	3.08014	-2.8328	1.80799	hsa-miR-6755-3p	up
20535133	MI0002468	0.0236	0.000983	3.9857	-0.9423	1.79796	hsa-mir-484	up
20504332	MIMAT0003263	0.0674	0.00503	3.22706	-2.5315	1.79136	hsa-miR-595	up
20525383	MIMAT0025844	0.00178	2.65e-05	5.722	2.6324	1.78777	hsa-miR-6716-5p	up
20519555	MIMAT0019836	0.0194	0.000744	4.11552	-0.6684	1.78379	hsa-miR-4722-5p	up
20529773	MIMAT0030990	0.00127	1.75e-05	5.93224	3.0439	1.77951	hsa-miR-8063	up
20500179	MIMAT0000096	0.0131	0.00044	4.36185	-0.1496	1.77907	hsa-miR-98-5p	up
20525739	MIMAT0027678	0.00287	5.13e-05	5.39323	1.9777	1.76737	hsa-miR-6889-5p	up
20505800	MIMAT0004956	0.00591	0.000151	4.86846	0.907	1.76022	hsa-miR-374b-3p	up
20525605	MIMAT0027544	0.198	0.0332	2.32031	-4.3126	1.75839	hsa-miR-6822-5p	up
20501161	MIMAT0004674	0.154	0.0206	2.55609	-3.8714	1.75693	hsa-miR-30c-1-3p	up
20503848	MIMAT0026610	0.0275	0.00121	3.88775	-1.1489	1.75555	hsa-miR-519d-5p	up
20518883	MIMAT0019023	0.0275	0.00123	3.88114	-1.1629	1.75422	hsa-miR-4489	up
20504344	MIMAT0003272	0.0981	0.00947	2.92966	-3.1376	1.7531	hsa-miR-604	up
20504407	MIMAT0022709	0.0528	0.00346	3.40202	-2.1688	1.75114	hsa-miR-652-5p	up
20515647	MIMAT0015087	0.162	0.0225	2.51268	-3.9541	1.74945	hsa-miR-514b-5p	up
20525565	MIMAT0027504	0.00498	0.000111	5.01657	1.2121	1.74596	hsa-miR-6802-5p	up
20505790	MIMAT0004948	0.0056	0.000136	4.91785	1.009	1.74143	hsa-miR-885-3p	up
20524053	MIMAT0024616	0.000612	6.71e-06	6.43114	3.9962	1.74127	hsa-miR-6132	up
20504357	MIMAT0003283	0.208	0.036	2.28021	-4.3855	1.74103	hsa-miR-615-3p	up
20500461	MIMAT0022693	0.00481	0.000104	5.04722	1.2749	1.73682	hsa-miR-204-3p	up
20504379	MIMAT0004810	0.107	0.0109	2.86176	-3.2736	1.73639	hsa-miR-629-5p	up
20518946	MIMAT0019082	0.013	0.000432	4.37041	-0.1316	1.72394	hsa-miR-4539	up
20500418	MIMAT0000242	0.0455	0.00262	3.5304	-1.9006	1.71856	hsa-miR-129-5p	up
20506010	MIMAT0022939	0.239	0.0464	2.15111	-4.6158	1.71708	hsa-miR-939-3p	up
20525509	MIMAT0027448	0.0657	0.00487	3.24263	-2.4994	1.71704	hsa-miR-6774-5p	up
20505206	MIMAT0003945	0.231	0.043	2.19007	-4.547	1.71489	hsa-miR-765	up
20515604	MIMAT0015053	0.00472	0.000101	5.05984	1.3008	1.70768	hsa-miR-3176	up
20503878	MIMAT0004774	0.000168	1.36e-06	7.30198	5.5733	1.70352	hsa-miR-501-3p	up
20500162	MIMAT0000087	0.000329	2.86e-06	6.88858	4.8383	1.70016	hsa-miR-30a-5p	up
20500490	MIMAT0009198	0.00355	6.89e-05	5.24831	1.685	1.69024	hsa-miR-224-3p	up
20522180	MIMAT0023116	0.0157	0.000571	4.23899	-0.4081	1.68253	hsa-miR-5739	up
20536985	MI0017385	0.028	0.00126	3.87026	-1.1858	1.68221	hsa-mir-4746	up
20525477	MIMAT0027416	0.0627	0.00456	3.27325	-2.4361	1.67899	hsa-miR-6758-5p	up
20519496	MIMAT0019777	0.000468	4.85e-06	6.60341	4.3168	1.67526	hsa-miR-4688	up
20519585	MIMAT0019864	0.0605	0.00427	3.30379	-2.3729	1.67242	hsa-miR-3064-5p	up
20505962	MIMAT0004971	0.107	0.0111	2.85418	-3.2887	1.67038	hsa-miR-921	up
20500723	MIMAT0000419	0.002	3.16e-05	5.63406	2.4586	1.66645	hsa-miR-27b-3p	up
20504333	MIMAT0003264	0.0742	0.006	3.14497	-2.7003	1.66529	hsa-miR-596	up
20504400	MIMAT0003316	0.0838	0.00734	3.05022	-2.8937	1.66291	hsa-miR-646	up
20500745	MIMAT0000431	0.17	0.0249	2.46376	-4.0465	1.66118	hsa-miR-140-5p	up
20500762	MIMAT0001618	0.0446	0.00254	3.54582	-1.8683	1.66056	hsa-miR-191-3p	up
20515558	MIMAT0015017	0.162	0.0229	2.50448	-3.9697	1.65809	hsa-miR-1273c	up
20515610	MIMAT0015058	0.00297	5.38e-05	5.36958	1.9301	1.65503	hsa-miR-3180-3p	up
20522033	MIMAT0022491	0.122	0.0142	2.7376	-3.5195	1.65284	hsa-miR-5698	up
20536552	MI0016048	0.0718	0.00566	3.17189	-2.645	1.65026	hsa-mir-3648	up
20519663	MIMAT0019940	0.00686	0.000182	4.77818	0.7201	1.64548	hsa-miR-4436b-5p	up
20525611	MIMAT0027550	0.013	0.000435	4.36721	-0.1384	1.64453	hsa-miR-6825-5p	up
20501276	MIMAT0000751	0.00313	5.73e-05	5.33824	1.8669	1.64257	hsa-miR-330-3p	up
20501183	MIMAT0000693	0.0159	0.000585	4.22824	-0.4308	1.64026	hsa-miR-30e-3p	up
20517726	MIMAT0016897	0.104	0.0105	2.88182	-3.2335	1.63468	hsa-miR-4269	up
20519702	MIMAT0019979	0.0501	0.00316	3.44404	-2.0812	1.6313	hsa-miR-4800-3p	up
20506797	MIMAT0005867	0.0543	0.0037	3.37046	-2.2345	1.6302	hsa-miR-663b	up
20500150	MIMAT0004498	0.0197	0.000763	4.10377	-0.6931	1.62888	hsa-miR-25-5p	up
20526180	MIMAT0028119	0.00165	2.4e-05	5.77198	2.7308	1.62853	hsa-miR-7111-5p	up
20529143	MIMAT0030426	0.0375	0.00194	3.67004	-1.6076	1.62799	hsa-miR-7851-3p	up
20519497	MIMAT0019778	0.000372	3.57e-06	6.76818	4.6196	1.62006	hsa-miR-4689	up
20515631	MIMAT0015075	0.0576	0.00397	3.33751	-2.3029	1.61762	hsa-miR-3191-3p	up
20500797	MIMAT0000460	0.0568	0.0039	3.34631	-2.2847	1.61661	hsa-miR-194-5p	up
20525470	MIMAT0027409	0.0467	0.00278	3.50277	-1.9585	1.6161	hsa-miR-6754-3p	up
20500746	MIMAT0004597	3.01e-05	1.17e-07	8.76268	7.9749	1.61602	hsa-miR-140-3p	up
20525481	MIMAT0027420	0.0479	0.00291	3.48182	-2.0023	1.61463	hsa-miR-6760-5p	up
20529134	MIMAT0030417	0.00486	0.000107	5.03609	1.2521	1.61325	hsa-miR-6516-5p	up
20506009	MIMAT0004982	0.0133	0.000448	4.35264	-0.169	1.61276	hsa-miR-939-5p	up
20517816	MIMAT0017986	0.107	0.0109	2.86151	-3.2741	1.61135	hsa-miR-3609	up
20501298	MIMAT0000764	0.00984	0.000276	4.58064	0.3089	1.60554	hsa-miR-339-5p	up
20503793	MIMAT0002809	0.0384	0.00203	3.64916	-1.6515	1.60253	hsa-miR-146b-5p	up
20505795	MIMAT0004952	0.00238	4e-05	5.51583	2.2234	1.60144	hsa-miR-665	up
20504576	MIMAT0022713	0.0664	0.00493	3.23667	-2.5117	1.59977	hsa-miR-1185-2-3p	up
20515650	MIMAT0015090	0.0421	0.00232	3.58764	-1.7807	1.59696	hsa-miR-1273d	up
20500159	MIMAT0004502	0.00171	2.52e-05	5.74759	2.6828	1.59456	hsa-miR-28-3p	up
20525021	MIMAT0025476	0.0321	0.00157	3.76774	-1.402	1.5934	hsa-miR-6510-5p	up
20504295	MIMAT0003237	0.148	0.0188	2.60027	-3.7866	1.59218	hsa-miR-572	up
20519506	MIMAT0019787	0.000387	3.78e-06	6.7375	4.5635	1.59147	hsa-miR-4694-3p	up
20518440	MIMAT0018191	0.152	0.0199	2.57439	-3.8364	1.58554	hsa-miR-3917	up
20518000	MIMAT0018165	0.162	0.0226	2.51255	-3.9543	1.5802	hsa-miR-3714	up
20536582	MI0016080	0.0364	0.00186	3.69093	-1.5637	1.57962	hsa-mir-3679	up
20518904	MIMAT0019044	0.000338	3.18e-06	6.8309	4.7337	1.57893	hsa-miR-4507	up
20500716	MIMAT0004585	0.0874	0.00799	3.01044	-2.9745	1.57593	hsa-let-7i-3p	up
20525469	MIMAT0027408	0.0127	0.00042	4.38271	-0.1058	1.56547	hsa-miR-6754-5p	up
20525659	MIMAT0027598	0.0961	0.00917	2.94518	-3.1063	1.56213	hsa-miR-6849-5p	up
20537600	MI0022701	0.0799	0.00672	3.09141	-2.8098	1.55628	hsa-mir-6855	up
20518807	MIMAT0018949	0.00462	9.79e-05	5.07734	1.3366	1.55457	hsa-miR-4433-3p	up
20518809	MIMAT0018951	0.0891	0.00826	2.99435	-3.0071	1.55252	hsa-miR-4435	up
20504297	MIMAT0004795	0.0509	0.00322	3.43526	-2.0995	1.54509	hsa-miR-574-5p	up
20509227	MIMAT0007883	0.000295	2.52e-06	6.958	4.9634	1.53623	hsa-miR-1909-3p	up
20500158	MIMAT0000085	0.000332	2.94e-06	6.87395	4.8118	1.5355	hsa-miR-28-5p	up
20518887	MIMAT0019027	0.000336	3.03e-06	6.8575	4.782	1.53271	hsa-miR-4492	up
20501287	MIMAT0000757	0.000159	1.24e-06	7.35322	5.6626	1.52967	hsa-miR-151a-3p	up
20505745	MIMAT0026718	0.162	0.0225	2.51343	-3.9527	1.52657	hsa-miR-874-5p	up
20517948	MIMAT0018115	0.00433	8.91e-05	5.123	1.4299	1.52003	hsa-miR-3687	up
20525475	MIMAT0027414	0.00542	0.000125	4.95946	1.0947	1.51969	hsa-miR-6757-5p	up
20503789	MIMAT0002807	0.0172	0.000645	4.18257	-0.527	1.51581	hsa-miR-491-5p	up
20525743	MIMAT0027682	0.00984	0.000278	4.57693	0.3011	1.51177	hsa-miR-6891-5p	up
20519642	MIMAT0019919	0.246	0.0488	2.12549	-4.6606	1.51142	hsa-miR-4767	up
20503885	MIMAT0026612	0.0607	0.00432	3.29873	-2.3834	1.50681	hsa-miR-504-3p	up
20504408	MIMAT0003322	0.000725	8.5e-06	6.30638	3.7613	1.50651	hsa-miR-652-3p	up
20501235	MIMAT0000727	0.0755	0.00617	3.13149	-2.7279	1.5032	hsa-miR-374a-5p	up
20504304	MIMAT0026616	0.107	0.0111	-2.85455	-3.288	-1.51219	hsa-miR-579-5p	down
20504305	MIMAT0003244	0.225	0.0408	-2.2169	-4.4993	-1.51219	hsa-miR-579-3p	down
20521830	MIMAT0022291	0.15	0.0194	-2.58697	-3.8122	-1.52094	hsa-miR-548au-5p	down
20534626	MI0000480	0.0759	0.00627	-3.12389	-2.7434	-1.52663	hsa-mir-154	down
20536927	MI0017329	0.175	0.0262	-2.4384	-4.0941	-1.53106	hsa-mir-4696	down
20500760	MIMAT0026480	0.0755	0.00619	-3.12982	-2.7313	-1.54719	hsa-miR-153-5p	down
20506861	MIMAT0005919	0.186	0.0291	-2.38638	-4.191	-1.55044	hsa-miR-548o-3p	down
20515519	MIMAT0014985	0.171	0.0251	-2.45921	-4.0551	-1.60873	hsa-miR-3123	down
20536311	MI0014237	0.0577	0.00401	-3.33343	-2.3114	-1.65624	hsa-mir-3192	down
20537226	MI0019311	0.0765	0.00633	-3.11968	-2.7521	-1.66601	hsa-mir-5692b	down
20515539	MIMAT0015002	0.16	0.022	-2.52422	-3.9322	-1.67302	hsa-miR-466	down
20504301	MIMAT0004796	0.0106	0.000313	-4.52106	0.1843	-1.77983	hsa-miR-576-3p	down
20501218	MIMAT0000717	0.202	0.0343	-2.30517	-4.3402	-1.81942	hsa-miR-302c-3p	down
20525694	MIMAT0027633	0.236	0.0448	-2.16909	-4.5841	-1.87659	hsa-miR-6866-3p	down
20525710	MIMAT0027649	0.248	0.0497	-2.11585	-4.6774	-1.87705	hsa-miR-6874-3p	down
20505792	MIMAT0004950	0.0342	0.00171	-3.72797	-1.4857	-1.92358	hsa-miR-877-3p	down
20519577	MIMAT0019856	0.16	0.0222	-2.52113	-3.938	-1.92498	hsa-miR-4732-3p	down
20501763	MIMAT0001075	0.149	0.0191	-2.5927	-3.8012	-1.9289	hsa-miR-384	down
20521805	MIMAT0022266	0.0293	0.00134	-3.84106	-1.2474	-1.99853	hsa-miR-548ar-3p	down
20536315	MI0014243	0.113	0.0123	-2.80633	-3.3838	-2.03257	hsa-mir-3118-5	down
20536194	MI0014133	0.0823	0.00708	-3.06712	-2.8594	-2.04898	hsa-mir-3118-3	down
20536192	MI0014131	0.0823	0.00708	-3.06712	-2.8594	-2.04898	hsa-mir-3118-1	down
20500166	MIMAT0000090	0.185	0.0288	-2.39127	-4.1819	-2.28398	hsa-miR-32-5p	down
20517823	MIMAT0017993	0.236	0.0449	-2.16761	-4.5867	-2.3791	hsa-miR-3614-3p	down
20525527	MIMAT0027466	0.107	0.011	-2.85971	-3.2777	-2.52053	hsa-miR-6783-5p	down
20526884	MIMAT0028234	0.0125	0.000396	-4.41041	-0.0476	-2.78851	hsa-miR-7162-5p	down

## Sheet: Sheet1
ID	Accession	Transcript ID
20500000	MIMAT0000001	cel-let-7-5p
20500001	MIMAT0015091	cel-let-7-3p
20500002	MIMAT0000002	cel-lin-4-5p
20500003	MIMAT0015092	cel-lin-4-3p
20500004	MIMAT0020301	cel-miR-1-5p
20500005	MIMAT0000003	cel-miR-1-3p
20500006	MIMAT0020302	cel-miR-2-5p
20500007	MIMAT0000004	cel-miR-2-3p
20500008	MIMAT0000005	cel-miR-34-5p
20500009	MIMAT0015093	cel-miR-34-3p
20500010	MIMAT0020303	cel-miR-35-5p
20500011	MIMAT0000006	cel-miR-35-3p
20500012	MIMAT0020304	cel-miR-36-5p
20500013	MIMAT0000007	cel-miR-36-3p
20500014	MIMAT0015094	cel-miR-37-5p
20500015	MIMAT0000008	cel-miR-37-3p
20500016	MIMAT0020305	cel-miR-38-5p
20500017	MIMAT0000009	cel-miR-38-3p
20500018	MIMAT0020306	cel-miR-39-5p
20500019	MIMAT0000010	cel-miR-39-3p
20500020	MIMAT0020307	cel-miR-40-5p
20500021	MIMAT0000011	cel-miR-40-3p
20500022	MIMAT0020770	cel-miR-41-5p
20500023	MIMAT0000012	cel-miR-41-3p
20500024	MIMAT0015095	cel-miR-42-5p
20500025	MIMAT0000013	cel-miR-42-3p
20500026	MIMAT0020308	cel-miR-43-5p
20500027	MIMAT0000014	cel-miR-43-3p
20500028	MIMAT0020771	cel-miR-44-5p
20500029	MIMAT0000015	cel-miR-44-3p
20500030	MIMAT0020772	cel-miR-45-5p
20500031	MIMAT0000016	cel-miR-45-3p
20500032	MIMAT0015096	cel-miR-46-5p
20500033	MIMAT0000017	cel-miR-46-3p
20500034	MIMAT0015097	cel-miR-47-5p
20500035	MIMAT0000018	cel-miR-47-3p
20500036	MIMAT0000019	cel-miR-48-5p
20500037	MIMAT0015098	cel-miR-48-3p
20500038	MIMAT0020309	cel-miR-49-5p
20500039	MIMAT0000020	cel-miR-49-3p
20500040	MIMAT0000021	cel-miR-50-5p
20500041	MIMAT0020310	cel-miR-50-3p
20500042	MIMAT0000022	cel-miR-51-5p
20500043	MIMAT0015099	cel-miR-51-3p
20500044	MIMAT0000023	cel-miR-52-5p
20500045	MIMAT0020311	cel-miR-52-3p
20500046	MIMAT0000024	cel-miR-53-5p
20500047	MIMAT0020312	cel-miR-53-3p
20500048	MIMAT0020773	cel-miR-54-5p
20500049	MIMAT0000025	cel-miR-54-3p
20500050	MIMAT0020313	cel-miR-55-5p
20500051	MIMAT0000026	cel-miR-55-3p
20500052	MIMAT0000027	cel-miR-56-5p
20500053	MIMAT0000028	cel-miR-56-3p
20500054	MIMAT0000029	cel-miR-57-5p
20500055	MIMAT0020314	cel-miR-57-3p
20500056	MIMAT0015100	cel-miR-58-5p
20500057	MIMAT0000030	cel-miR-58-3p
20500058	MIMAT0015101	cel-miR-59-5p
20500059	MIMAT0000031	cel-miR-59-3p
20500060	MIMAT0015102	cel-miR-60-5p
20500061	MIMAT0000032	cel-miR-60-3p
20500062	MIMAT0015103	cel-miR-61-5p
20500063	MIMAT0000033	cel-miR-61-3p
20500064	MIMAT0000034	cel-miR-62
20500065	MIMAT0015104	cel-miR-63-5p
20500066	MIMAT0000035	cel-miR-63-3p
20500067	MIMAT0000036	cel-miR-64-5p
20500068	MIMAT0015105	cel-miR-64-3p
20500069	MIMAT0000037	cel-miR-65-5p
20500070	MIMAT0015106	cel-miR-65-3p
20500071	MIMAT0000038	cel-miR-66-5p
20500072	MIMAT0020315	cel-miR-66-3p
20500073	MIMAT0020316	cel-miR-67-5p
20500074	MIMAT0000039	cel-miR-67-3p
20500075	MIMAT0020317	cel-miR-70-5p
20500076	MIMAT0000042	cel-miR-70-3p
20500077	MIMAT0000043	cel-miR-71-5p
20500078	MIMAT0015107	cel-miR-71-3p
20500079	MIMAT0000044	cel-miR-72-5p
20500080	MIMAT0020318	cel-miR-72-3p
20500081	MIMAT0020319	cel-miR-73-5p
20500082	MIMAT0000045	cel-miR-73-3p
20500083	MIMAT0020320	cel-miR-74-5p
20500084	MIMAT0000046	cel-miR-74-3p
20500085	MIMAT0015108	cel-miR-75-5p
20500086	MIMAT0000047	cel-miR-75-3p
20500087	MIMAT0020321	cel-miR-76-5p
20500088	MIMAT0000048	cel-miR-76-3p
20500089	MIMAT0020774	cel-miR-77-5p
20500090	MIMAT0000049	cel-miR-77-3p
20500091	MIMAT0000050	cel-miR-78
20500092	MIMAT0020322	cel-miR-79-5p
20500093	MIMAT0000051	cel-miR-79-3p
20500094	MIMAT0000052	cel-miR-80-5p
20500095	MIMAT0000053	cel-miR-80-3p
20500096	MIMAT0015109	cel-miR-81-5p
20500097	MIMAT0000054	cel-miR-81-3p
20500098	MIMAT0020323	cel-miR-82-5p
20500099	MIMAT0000055	cel-miR-82-3p
20500100	MIMAT0020775	cel-miR-83-5p
20500101	MIMAT0000056	cel-miR-83-3p
20500102	MIMAT0000057	cel-miR-84-5p
20500103	MIMAT0015110	cel-miR-84-3p
20500104	MIMAT0020324	cel-miR-85-5p
20500105	MIMAT0000058	cel-miR-85-3p
20500106	MIMAT0000059	cel-miR-86-5p
20500107	MIMAT0020776	cel-miR-86-3p
20500108	MIMAT0020325	cel-miR-87-5p
20500109	MIMAT0000060	cel-miR-87-3p
20500110	MIMAT0020326	cel-miR-90-5p
20500111	MIMAT0000061	cel-miR-90-3p
20500112	MIMAT0000062	hsa-let-7a-5p
		hsa-let-7a-5p
20500113	MIMAT0004481	hsa-let-7a-3p
		hsa-let-7a-3p
20500114	MIMAT0010195	hsa-let-7a-2-3p
20500115	MIMAT0000063	hsa-let-7b-5p
		hsa-let-7b-5p
20500116	MIMAT0004482	hsa-let-7b-3p
		hsa-let-7b-3p
20500117	MIMAT0000064	hsa-let-7c-5p
		hsa-let-7c-5p
20500118	MIMAT0026472	hsa-let-7c-3p
20500119	MIMAT0000065	hsa-let-7d-5p
		hsa-let-7d-5p
20500120	MIMAT0004484	hsa-let-7d-3p
20500121	MIMAT0000066	hsa-let-7e-5p
		hsa-let-7e-5p
20500122	MIMAT0004485	hsa-let-7e-3p
		hsa-let-7e-3p
20500123	MIMAT0000067	hsa-let-7f-5p
		hsa-let-7f-5p
20500124	MIMAT0004486	hsa-let-7f-1-3p
		hsa-let-7f-1-3p
20500125	MIMAT0004487	hsa-let-7f-2-3p
		hsa-let-7f-2-3p
20500126	MIMAT0000068	hsa-miR-15a-5p
		hsa-miR-15a-5p
20500127	MIMAT0004488	hsa-miR-15a-3p
		hsa-miR-15a-3p
20500128	MIMAT0000069	hsa-miR-16-5p
		hsa-miR-16-5p
20500129	MIMAT0004489	hsa-miR-16-1-3p
		hsa-miR-16-1-3p
20500130	MIMAT0000070	hsa-miR-17-5p
		hsa-miR-17-5p
20500131	MIMAT0000071	hsa-miR-17-3p
		hsa-miR-17-3p
20500132	MIMAT0000072	hsa-miR-18a-5p
		hsa-miR-18a-5p
20500133	MIMAT0002891	hsa-miR-18a-3p
20500134	MIMAT0004490	hsa-miR-19a-5p
20500135	MIMAT0000073	hsa-miR-19a-3p
		hsa-miR-19a-3p
20500136	MIMAT0004491	hsa-miR-19b-1-5p
		hsa-miR-19b-1-5p
20500137	MIMAT0000074	hsa-miR-19b-3p
		hsa-miR-19b-3p
20500138	MIMAT0004492	hsa-miR-19b-2-5p
		hsa-miR-19b-2-5p
20500139	MIMAT0000075	hsa-miR-20a-5p
		hsa-miR-20a-5p
20500140	MIMAT0004493	hsa-miR-20a-3p
		hsa-miR-20a-3p
20500141	MIMAT0000076	hsa-miR-21-5p
		hsa-miR-21-5p
20500142	MIMAT0004494	hsa-miR-21-3p
		hsa-miR-21-3p
20500143	MIMAT0004495	hsa-miR-22-5p
		hsa-miR-22-5p
20500144	MIMAT0000077	hsa-miR-22-3p
		hsa-miR-22-3p
20500145	MIMAT0004496	hsa-miR-23a-5p
		hsa-miR-23a-5p
20500146	MIMAT0000078	hsa-miR-23a-3p
		hsa-miR-23a-3p
20500147	MIMAT0000079	hsa-miR-24-1-5p
		hsa-miR-24-1-5p
20500148	MIMAT0000080	hsa-miR-24-3p
		hsa-miR-24-3p
20500149	MIMAT0004497	hsa-miR-24-2-5p
		hsa-miR-24-2-5p
20500150	MIMAT0004498	hsa-miR-25-5p
20500151	MIMAT0000081	hsa-miR-25-3p
		hsa-miR-25-3p
20500152	MIMAT0000082	hsa-miR-26a-5p
		hsa-miR-26a-5p
20500153	MIMAT0004499	hsa-miR-26a-1-3p
		hsa-miR-26a-1-3p
20500154	MIMAT0000083	hsa-miR-26b-5p
20500155	MIMAT0004500	hsa-miR-26b-3p
		hsa-miR-26b-3p
20500156	MIMAT0004501	hsa-miR-27a-5p
		hsa-miR-27a-5p
20500157	MIMAT0000084	hsa-miR-27a-3p
		hsa-miR-27a-3p
20500158	MIMAT0000085	hsa-miR-28-5p
20500159	MIMAT0004502	hsa-miR-28-3p
		hsa-miR-28-3p
20500160	MIMAT0004503	hsa-miR-29a-5p
		hsa-miR-29a-5p
20500161	MIMAT0000086	hsa-miR-29a-3p
		hsa-miR-29a-3p
20500162	MIMAT0000087	hsa-miR-30a-5p
		hsa-miR-30a-5p
20500163	MIMAT0000088	hsa-miR-30a-3p
		hsa-miR-30a-3p
20500164	MIMAT0000089	hsa-miR-31-5p
		hsa-miR-31-5p
20500165	MIMAT0004504	hsa-miR-31-3p
		hsa-miR-31-3p
20500166	MIMAT0000090	hsa-miR-32-5p
		hsa-miR-32-5p
20500167	MIMAT0004505	hsa-miR-32-3p
20500168	MIMAT0000091	hsa-miR-33a-5p
		hsa-miR-33a-5p
20500169	MIMAT0004506	hsa-miR-33a-3p
20500170	MIMAT0004507	hsa-miR-92a-1-5p
20500171	MIMAT0000092	hsa-miR-92a-3p
		hsa-miR-92a-3p
20500172	MIMAT0004508	hsa-miR-92a-2-5p
		hsa-miR-92a-2-5p
20500173	MIMAT0000093	hsa-miR-93-5p
		hsa-miR-93-5p
20500174	MIMAT0004509	hsa-miR-93-3p
		hsa-miR-93-3p
20500175	MIMAT0026473	hsa-miR-95-5p
20500176	MIMAT0000094	hsa-miR-95-3p
		hsa-miR-95-3p
20500177	MIMAT0000095	hsa-miR-96-5p
		hsa-miR-96-5p
20500178	MIMAT0004510	hsa-miR-96-3p
20500179	MIMAT0000096	hsa-miR-98-5p
		hsa-miR-98-5p
20500180	MIMAT0022842	hsa-miR-98-3p
20500181	MIMAT0000097	hsa-miR-99a-5p
		hsa-miR-99a-5p
20500182	MIMAT0004511	hsa-miR-99a-3p
		hsa-miR-99a-3p
20500183	MIMAT0000098	hsa-miR-100-5p
		hsa-miR-100-5p
20500184	MIMAT0004512	hsa-miR-100-3p
20500185	MIMAT0004513	hsa-miR-101-5p
		hsa-miR-101-5p
20500186	MIMAT0000099	hsa-miR-101-3p
20500187	MIMAT0004514	hsa-miR-29b-1-5p
		hsa-miR-29b-1-5p
20500188	MIMAT0000100	hsa-miR-29b-3p
		hsa-miR-29b-3p
20500189	MIMAT0004515	hsa-miR-29b-2-5p
		hsa-miR-29b-2-5p
20500190	MIMAT0009196	hsa-miR-103a-2-5p
20500191	MIMAT0000101	hsa-miR-103a-3p
		hsa-miR-103a-3p
20500192	MIMAT0000102	hsa-miR-105-5p
		hsa-miR-105-5p
20500193	MIMAT0004516	hsa-miR-105-3p
		hsa-miR-105-3p
20500194	MIMAT0000103	hsa-miR-106a-5p
		hsa-miR-106a-5p
20500195	MIMAT0004517	hsa-miR-106a-3p
		hsa-miR-106a-3p
20500196	MIMAT0000104	hsa-miR-107
		hsa-miR-107
20500197	MIMAT0004518	hsa-miR-16-2-3p
20500198	MIMAT0020779	dme-miR-1-5p
20500199	MIMAT0000105	dme-miR-1-3p
20500200	MIMAT0020780	dme-miR-2a-1-5p
20500201	MIMAT0000106	dme-miR-2a-3p
20500202	MIMAT0020781	dme-miR-2a-2-5p
20500203	MIMAT0020782	dme-miR-2b-1-5p
20500204	MIMAT0000107	dme-miR-2b-3p
20500205	MIMAT0020783	dme-miR-2b-2-5p
20500206	MIMAT0020784	dme-miR-3-5p
20500207	MIMAT0000108	dme-miR-3-3p
20500208	MIMAT0020785	dme-miR-4-5p
20500209	MIMAT0000109	dme-miR-4-3p
20500210	MIMAT0000110	dme-miR-5-5p
20500211	MIMAT0020786	dme-miR-5-3p
20500212	MIMAT0020787	dme-miR-6-1-5p
20500213	MIMAT0000111	dme-miR-6-3p
20500214	MIMAT0020788	dme-miR-6-2-5p
20500215	MIMAT0020789	dme-miR-6-3-5p
20500216	MIMAT0000112	dme-miR-7-5p
20500217	MIMAT0020790	dme-miR-7-3p
20500218	MIMAT0020791	dme-miR-8-5p
20500219	MIMAT0000113	dme-miR-8-3p
20500220	MIMAT0000114	dme-miR-9a-5p
20500221	MIMAT0020792	dme-miR-9a-3p
20500222	MIMAT0000115	dme-miR-10-5p
20500223	MIMAT0012531	dme-miR-10-3p
20500224	MIMAT0020793	dme-miR-11-5p
20500225	MIMAT0000116	dme-miR-11-3p
20500226	MIMAT0000117	dme-miR-12-5p
20500227	MIMAT0020794	dme-miR-12-3p
20500228	MIMAT0020795	dme-miR-13a-5p
20500229	MIMAT0000118	dme-miR-13a-3p
20500230	MIMAT0020796	dme-miR-13b-1-5p
20500231	MIMAT0000119	dme-miR-13b-3p
20500232	MIMAT0020797	dme-miR-13b-2-5p
20500233	MIMAT0020798	dme-miR-14-5p
20500234	MIMAT0000120	dme-miR-14-3p
20500235	MIMAT0000121	mmu-let-7g-5p
		mmu-let-7g-5p
20500236	MIMAT0004519	mmu-let-7g-3p
		mmu-let-7g-3p
20500237	MIMAT0000122	mmu-let-7i-5p
		mmu-let-7i-5p
20500238	MIMAT0004520	mmu-let-7i-3p
		mmu-let-7i-3p
20500239	MIMAT0016979	mmu-miR-1a-1-5p
20500240	MIMAT0000123	mmu-miR-1a-3p
20500241	MIMAT0000124	mmu-miR-15b-5p
		mmu-miR-15b-5p
20500242	MIMAT0004521	mmu-miR-15b-3p
		mmu-miR-15b-3p
20500243	MIMAT0016980	mmu-miR-23b-5p
20500244	MIMAT0000125	mmu-miR-23b-3p
		mmu-miR-23b-3p
20500245	MIMAT0004522	mmu-miR-27b-5p
		mmu-miR-27b-5p
20500246	MIMAT0000126	mmu-miR-27b-3p
20500247	MIMAT0004523	mmu-miR-29b-1-5p
		mmu-miR-29b-1-5p
20500248	MIMAT0000127	mmu-miR-29b-3p
		mmu-miR-29b-3p
20500249	MIMAT0000128	mmu-miR-30a-5p
		mmu-miR-30a-5p
20500250	MIMAT0000129	mmu-miR-30a-3p
		mmu-miR-30a-3p
20500251	MIMAT0000130	mmu-miR-30b-5p
		mmu-miR-30b-5p
20500252	MIMAT0004524	mmu-miR-30b-3p
		mmu-miR-30b-3p
20500253	MIMAT0000131	mmu-miR-99a-5p
20500254	MIMAT0016981	mmu-miR-99a-3p
20500255	MIMAT0000132	mmu-miR-99b-5p
		mmu-miR-99b-5p
20500256	MIMAT0004525	mmu-miR-99b-3p
		mmu-miR-99b-3p
20500257	MIMAT0004526	mmu-miR-101a-5p
20500258	MIMAT0000133	mmu-miR-101a-3p
		mmu-miR-101a-3p
20500259	MIMAT0004527	mmu-miR-124-5p
		mmu-miR-124-5p
20500260	MIMAT0000134	mmu-miR-124-3p
		mmu-miR-124-3p
20500261	MIMAT0000135	mmu-miR-125a-5p
		mmu-miR-125a-5p
20500262	MIMAT0004528	mmu-miR-125a-3p
		mmu-miR-125a-3p
20500263	MIMAT0000136	mmu-miR-125b-5p
20500264	MIMAT0004529	mmu-miR-125b-2-3p
		mmu-miR-125b-2-3p
20500265	MIMAT0000137	mmu-miR-126a-5p
		mmu-miR-126a-5p
20500266	MIMAT0000138	mmu-miR-126a-3p
		mmu-miR-126a-3p
20500267	MIMAT0004530	mmu-miR-127-5p
20500268	MIMAT0000139	mmu-miR-127-3p
		mmu-miR-127-3p
20500269	MIMAT0016982	mmu-miR-128-1-5p
20500270	MIMAT0000140	mmu-miR-128-3p
		mmu-miR-128-3p
20500271	MIMAT0016983	mmu-miR-130a-5p
20500272	MIMAT0000141	mmu-miR-130a-3p
		mmu-miR-130a-3p
20500273	MIMAT0000142	mmu-miR-9-5p
		mmu-miR-9-5p
20500274	MIMAT0000143	mmu-miR-9-3p
		mmu-miR-9-3p
20500275	MIMAT0016984	mmu-miR-132-5p
20500276	MIMAT0000144	mmu-miR-132-3p
		mmu-miR-132-3p
20500277	MIMAT0003473	mmu-miR-133a-5p
20500278	MIMAT0000145	mmu-miR-133a-3p
		mmu-miR-133a-3p
20500279	MIMAT0000146	mmu-miR-134-5p
20500280	MIMAT0016985	mmu-miR-134-3p
20500281	MIMAT0000147	mmu-miR-135a-5p
20500282	MIMAT0004531	mmu-miR-135a-1-3p
		mmu-miR-135a-1-3p
20500283	MIMAT0000148	mmu-miR-136-5p
		mmu-miR-136-5p
20500284	MIMAT0004532	mmu-miR-136-3p
		mmu-miR-136-3p
20500285	MIMAT0016986	mmu-miR-137-5p
20500286	MIMAT0000149	mmu-miR-137-3p
		mmu-miR-137-3p
20500287	MIMAT0000150	mmu-miR-138-5p
		mmu-miR-138-5p
20500288	MIMAT0016987	mmu-miR-138-2-3p
20500289	MIMAT0000151	mmu-miR-140-5p
		mmu-miR-140-5p
20500290	MIMAT0000152	mmu-miR-140-3p
		mmu-miR-140-3p
20500291	MIMAT0004533	mmu-miR-141-5p
20500292	MIMAT0000153	mmu-miR-141-3p
		mmu-miR-141-3p
20500293	MIMAT0000154	mmu-miR-142-5p
		mmu-miR-142-5p
20500294	MIMAT0000155	mmu-miR-142-3p
		mmu-miR-142-3p
20500295	MIMAT0016988	mmu-miR-144-5p
20500296	MIMAT0000156	mmu-miR-144-3p
20500297	MIMAT0000157	mmu-miR-145a-5p
		mmu-miR-145a-5p
20500298	MIMAT0004534	mmu-miR-145a-3p
20500299	MIMAT0000158	mmu-miR-146a-5p
		mmu-miR-146a-5p
20500300	MIMAT0016989	mmu-miR-146a-3p
20500301	MIMAT0000159	mmu-miR-149-5p
		mmu-miR-149-5p
20500302	MIMAT0016990	mmu-miR-149-3p
20500303	MIMAT0000160	mmu-miR-150-5p
		mmu-miR-150-5p
20500304	MIMAT0004535	mmu-miR-150-3p
		mmu-miR-150-3p
20500305	MIMAT0004536	mmu-miR-151-5p
		mmu-miR-151-5p
20500306	MIMAT0000161	mmu-miR-151-3p
		mmu-miR-151-3p
20500307	MIMAT0016991	mmu-miR-152-5p
20500308	MIMAT0000162	mmu-miR-152-3p
		mmu-miR-152-3p
20500309	MIMAT0016992	mmu-miR-153-5p
20500310	MIMAT0000163	mmu-miR-153-3p
		mmu-miR-153-3p
20500311	MIMAT0000164	mmu-miR-154-5p
		mmu-miR-154-5p
20500312	MIMAT0004537	mmu-miR-154-3p
		mmu-miR-154-3p
20500313	MIMAT0000165	mmu-miR-155-5p
		mmu-miR-155-5p
20500314	MIMAT0016993	mmu-miR-155-3p
20500315	MIMAT0000166	ath-miR156a
20500316	MIMAT0000167	ath-miR156b
20500317	MIMAT0000168	ath-miR156c
20500318	MIMAT0000169	ath-miR156d
20500319	MIMAT0000170	ath-miR156e
20500320	MIMAT0000171	ath-miR156f
20500321	MIMAT0000172	ath-miR157a
20500322	MIMAT0000173	ath-miR157b
20500323	MIMAT0000174	ath-miR157c
20500324	MIMAT0000175	ath-miR157d
20500325	MIMAT0000176	ath-miR158a
20500326	MIMAT0000177	ath-miR159a
20500327	MIMAT0000178	ath-miR160a
20500328	MIMAT0000179	ath-miR160b
20500329	MIMAT0000180	ath-miR160c
20500330	MIMAT0006779	ath-miR161.2
20500331	MIMAT0000181	ath-miR161.1
20500332	MIMAT0000182	ath-miR162a
20500333	MIMAT0000183	ath-miR162b
20500334	MIMAT0000184	ath-miR163
20500335	MIMAT0000185	ath-miR164a
20500336	MIMAT0000186	ath-miR164b
20500337	MIMAT0000187	ath-miR165a
20500338	MIMAT0000188	ath-miR165b
20500339	MIMAT0000189	ath-miR166a
20500340	MIMAT0000190	ath-miR166b
20500341	MIMAT0000191	ath-miR166c
20500342	MIMAT0000192	ath-miR166d
20500343	MIMAT0000193	ath-miR166e
20500344	MIMAT0000194	ath-miR166f
20500345	MIMAT0000195	ath-miR166g
20500346	MIMAT0000196	ath-miR167a
20500347	MIMAT0000197	ath-miR167b
20500348	MIMAT0000198	ath-miR168a
20500349	MIMAT0000199	ath-miR168b
20500350	MIMAT0000200	ath-miR169a
20500351	MIMAT0000201	ath-miR170
20500352	MIMAT0000202	ath-miR171a
20500353	MIMAT0000203	ath-miR172a
20500354	MIMAT0000204	ath-miR172b-5p
20500355	MIMAT0000205	ath-miR172b-3p
20500356	MIMAT0000206	ath-miR173-5p
20500357	MIMAT0022843	ath-miR173-3p
20500358	MIMAT0000207	ath-miR159b
20500359	MIMAT0000208	mmu-miR-10b-5p
		mmu-miR-10b-5p
20500360	MIMAT0004538	mmu-miR-10b-3p
		mmu-miR-10b-3p
20500361	MIMAT0000209	mmu-miR-129-5p
20500362	MIMAT0016994	mmu-miR-129-1-3p
20500363	MIMAT0000210	mmu-miR-181a-5p
		mmu-miR-181a-5p
20500364	MIMAT0005443	mmu-miR-181a-2-3p
		mmu-miR-181a-2-3p
20500365	MIMAT0000211	mmu-miR-182-5p
		mmu-miR-182-5p
20500366	MIMAT0016995	mmu-miR-182-3p
20500367	MIMAT0000212	mmu-miR-183-5p
		mmu-miR-183-5p
20500368	MIMAT0004539	mmu-miR-183-3p
20500369	MIMAT0022690	mmu-miR-184-5p
20500370	MIMAT0000213	mmu-miR-184-3p
		mmu-miR-184-3p
20500371	MIMAT0000214	mmu-miR-185-5p
20500372	MIMAT0016996	mmu-miR-185-3p
20500373	MIMAT0000215	mmu-miR-186-5p
		mmu-miR-186-5p
20500374	MIMAT0004540	mmu-miR-186-3p
20500375	MIMAT0016997	mmu-miR-187-5p
20500376	MIMAT0000216	mmu-miR-187-3p
		mmu-miR-187-3p
20500377	MIMAT0000217	mmu-miR-188-5p
20500378	MIMAT0004541	mmu-miR-188-3p
20500379	MIMAT0000218	mmu-miR-24-1-5p
		mmu-miR-24-1-5p
20500380	MIMAT0000219	mmu-miR-24-3p
		mmu-miR-24-3p
20500381	MIMAT0000220	mmu-miR-190a-5p
		mmu-miR-190a-5p
20500382	MIMAT0016998	mmu-miR-190a-3p
20500383	MIMAT0000221	mmu-miR-191-5p
		mmu-miR-191-5p
20500384	MIMAT0004542	mmu-miR-191-3p
		mmu-miR-191-3p
20500385	MIMAT0000222	hsa-miR-192-5p
		hsa-miR-192-5p
20500386	MIMAT0004543	hsa-miR-192-3p
		hsa-miR-192-3p
20500387	MIMAT0004544	mmu-miR-193a-5p
		mmu-miR-193a-5p
20500388	MIMAT0000223	mmu-miR-193a-3p
		mmu-miR-193a-3p
20500389	MIMAT0000224	mmu-miR-194-5p
		mmu-miR-194-5p
20500390	MIMAT0016999	mmu-miR-194-1-3p
20500391	MIMAT0000225	mmu-miR-195a-5p
		mmu-miR-195a-5p
20500392	MIMAT0017000	mmu-miR-195a-3p
20500393	MIMAT0000226	hsa-miR-196a-5p
		hsa-miR-196a-5p
20500394	MIMAT0022691	hsa-miR-197-5p
20500395	MIMAT0000227	hsa-miR-197-3p
		hsa-miR-197-3p
20500396	MIMAT0000228	hsa-miR-198
		hsa-miR-198
20500397	MIMAT0000229	mmu-miR-199a-5p
		mmu-miR-199a-5p
20500398	MIMAT0000230	mmu-miR-199a-3p
		mmu-miR-199a-3p
20500399	MIMAT0000231	hsa-miR-199a-5p
20500400	MIMAT0000232	hsa-miR-199a-3p
		hsa-miR-199a-3p
20500401	MIMAT0004545	mmu-miR-200b-5p
		mmu-miR-200b-5p
20500402	MIMAT0000233	mmu-miR-200b-3p
20500403	MIMAT0000234	mmu-miR-201-5p
		mmu-miR-201-5p
20500404	MIMAT0017001	mmu-miR-201-3p
20500405	MIMAT0004546	mmu-miR-202-5p
20500406	MIMAT0000235	mmu-miR-202-3p
		mmu-miR-202-3p
20500407	MIMAT0004547	mmu-miR-203-5p
20500408	MIMAT0000236	mmu-miR-203-3p
		mmu-miR-203-3p
20500409	MIMAT0000237	mmu-miR-204-5p
		mmu-miR-204-5p
20500410	MIMAT0017002	mmu-miR-204-3p
20500411	MIMAT0000238	mmu-miR-205-5p
		mmu-miR-205-5p
20500412	MIMAT0017003	mmu-miR-205-3p
20500413	MIMAT0017004	mmu-miR-206-5p
20500414	MIMAT0000239	mmu-miR-206-3p
		mmu-miR-206-3p
20500415	MIMAT0000240	mmu-miR-207
		mmu-miR-207
20500416	MIMAT0026474	hsa-miR-208a-5p
20500417	MIMAT0000241	hsa-miR-208a-3p
		hsa-miR-208a-3p
20500418	MIMAT0000242	hsa-miR-129-5p
		hsa-miR-129-5p
20500419	MIMAT0004548	hsa-miR-129-1-3p
20500420	MIMAT0004549	hsa-miR-148a-5p
		hsa-miR-148a-5p
20500421	MIMAT0000243	hsa-miR-148a-3p
		hsa-miR-148a-3p
20500422	MIMAT0000244	hsa-miR-30c-5p
		hsa-miR-30c-5p
20500423	MIMAT0004550	hsa-miR-30c-2-3p
		hsa-miR-30c-2-3p
20500424	MIMAT0000245	hsa-miR-30d-5p
		hsa-miR-30d-5p
20500425	MIMAT0004551	hsa-miR-30d-3p
		hsa-miR-30d-3p
20500426	MIMAT0000246	mmu-miR-122-5p
		mmu-miR-122-5p
20500427	MIMAT0017005	mmu-miR-122-3p
20500428	MIMAT0017006	mmu-miR-143-5p
20500429	MIMAT0000247	mmu-miR-143-3p
20500430	MIMAT0000248	mmu-miR-30e-5p
20500431	MIMAT0000249	mmu-miR-30e-3p
		mmu-miR-30e-3p
20500432	MIMAT0000250	hsa-miR-139-5p
		hsa-miR-139-5p
20500433	MIMAT0004552	hsa-miR-139-3p
		hsa-miR-139-3p
20500434	MIMAT0000251	hsa-miR-147a
		hsa-miR-147a
20500435	MIMAT0000252	hsa-miR-7-5p
		hsa-miR-7-5p
20500436	MIMAT0004553	hsa-miR-7-1-3p
20500437	MIMAT0004554	hsa-miR-7-2-3p
20500438	MIMAT0000253	hsa-miR-10a-5p
		hsa-miR-10a-5p
20500439	MIMAT0004555	hsa-miR-10a-3p
		hsa-miR-10a-3p
20500440	MIMAT0000254	hsa-miR-10b-5p
		hsa-miR-10b-5p
20500441	MIMAT0004556	hsa-miR-10b-3p
		hsa-miR-10b-3p
20500442	MIMAT0000255	hsa-miR-34a-5p
		hsa-miR-34a-5p
20500443	MIMAT0004557	hsa-miR-34a-3p
		hsa-miR-34a-3p
20500444	MIMAT0000256	hsa-miR-181a-5p
		hsa-miR-181a-5p
20500445	MIMAT0004558	hsa-miR-181a-2-3p
		hsa-miR-181a-2-3p
20500446	MIMAT0000257	hsa-miR-181b-5p
		hsa-miR-181b-5p
20500447	MIMAT0022692	hsa-miR-181b-3p
20500448	MIMAT0000258	hsa-miR-181c-5p
20500449	MIMAT0004559	hsa-miR-181c-3p
		hsa-miR-181c-3p
20500450	MIMAT0000259	hsa-miR-182-5p
		hsa-miR-182-5p
20500451	MIMAT0000260	hsa-miR-182-3p
		hsa-miR-182-3p
20500452	MIMAT0000261	hsa-miR-183-5p
20500453	MIMAT0004560	hsa-miR-183-3p
20500454	MIMAT0004561	hsa-miR-187-5p
		hsa-miR-187-5p
20500455	MIMAT0000262	hsa-miR-187-3p
		hsa-miR-187-3p
20500456	MIMAT0004562	hsa-miR-196a-3p
20500457	MIMAT0000263	hsa-miR-199b-5p
		hsa-miR-199b-5p
20500458	MIMAT0004563	hsa-miR-199b-3p
20500459	MIMAT0000264	hsa-miR-203a
		hsa-miR-203a
20500460	MIMAT0000265	hsa-miR-204-5p
		hsa-miR-204-5p
20500461	MIMAT0022693	hsa-miR-204-3p
20500462	MIMAT0000266	hsa-miR-205-5p
		hsa-miR-205-5p
20500463	MIMAT0009197	hsa-miR-205-3p
20500464	MIMAT0026475	hsa-miR-210-5p
20500465	MIMAT0000267	hsa-miR-210-3p
		hsa-miR-210-3p
20500466	MIMAT0000268	hsa-miR-211-5p
20500467	MIMAT0022694	hsa-miR-211-3p
20500468	MIMAT0022695	hsa-miR-212-5p
20500469	MIMAT0000269	hsa-miR-212-3p
20500470	MIMAT0000270	hsa-miR-181a-3p
		hsa-miR-181a-3p
20500471	MIMAT0004564	hsa-miR-214-5p
20500472	MIMAT0000271	hsa-miR-214-3p
20500473	MIMAT0000272	hsa-miR-215-5p
		hsa-miR-215-5p
20500474	MIMAT0026476	hsa-miR-215-3p
20500475	MIMAT0000273	hsa-miR-216a-5p
		hsa-miR-216a-5p
20500476	MIMAT0022844	hsa-miR-216a-3p
20500477	MIMAT0000274	hsa-miR-217
		hsa-miR-217
20500478	MIMAT0000275	hsa-miR-218-5p
		hsa-miR-218-5p
20500479	MIMAT0004565	hsa-miR-218-1-3p
20500480	MIMAT0004566	hsa-miR-218-2-3p
		hsa-miR-218-2-3p
20500481	MIMAT0000276	hsa-miR-219a-5p
		hsa-miR-219a-5p
20500482	MIMAT0004567	hsa-miR-219a-1-3p
		hsa-miR-219a-1-3p
20500483	MIMAT0004568	hsa-miR-221-5p
20500484	MIMAT0000278	hsa-miR-221-3p
		hsa-miR-221-3p
20500485	MIMAT0004569	hsa-miR-222-5p
20500486	MIMAT0000279	hsa-miR-222-3p
20500487	MIMAT0004570	hsa-miR-223-5p
20500488	MIMAT0000280	hsa-miR-223-3p
		hsa-miR-223-3p
20500489	MIMAT0000281	hsa-miR-224-5p
		hsa-miR-224-5p
20500490	MIMAT0009198	hsa-miR-224-3p
20500491	MIMAT0015111	cel-miR-124-5p
20500492	MIMAT0000282	cel-miR-124-3p
20500493	MIMAT0000283	cel-miR-228-5p
20500494	MIMAT0020327	cel-miR-228-3p
20500495	MIMAT0000284	cel-miR-229-5p
20500496	MIMAT0015112	cel-miR-229-3p
20500497	MIMAT0015113	cel-miR-230-5p
20500498	MIMAT0000285	cel-miR-230-3p
20500499	MIMAT0020328	cel-miR-231-5p
20500500	MIMAT0000286	cel-miR-231-3p
20500501	MIMAT0020777	cel-miR-232-5p
20500502	MIMAT0000287	cel-miR-232-3p
20500503	MIMAT0020329	cel-miR-233-5p
20500504	MIMAT0000288	cel-miR-233-3p
20500505	MIMAT0020330	cel-miR-234-5p
20500506	MIMAT0000289	cel-miR-234-3p
20500507	MIMAT0020331	cel-miR-235-5p
20500508	MIMAT0000290	cel-miR-235-3p
20500509	MIMAT0020332	cel-miR-236-5p
20500510	MIMAT0000291	cel-miR-236-3p
20500511	MIMAT0000292	cel-miR-237-5p
20500512	MIMAT0020333	cel-miR-237-3p
20500513	MIMAT0015114	cel-miR-238-5p
20500514	MIMAT0000293	cel-miR-238-3p
20500515	MIMAT0000294	cel-miR-239a-5p
20500516	MIMAT0020334	cel-miR-239a-3p
20500517	MIMAT0000295	cel-miR-239b-5p
20500518	MIMAT0015115	cel-miR-239b-3p
20500519	MIMAT0015116	cel-miR-240-5p
20500520	MIMAT0000296	cel-miR-240-3p
20500521	MIMAT0000297	cel-miR-241-5p
20500522	MIMAT0020335	cel-miR-241-3p
20500523	MIMAT0000298	cel-miR-242
20500524	MIMAT0015117	cel-miR-243-5p
20500525	MIMAT0000299	cel-miR-243-3p
20500526	MIMAT0000300	cel-miR-244-5p
20500527	MIMAT0015118	cel-miR-244-3p
20500528	MIMAT0020336	cel-miR-245-5p
20500529	MIMAT0000301	cel-miR-245-3p
20500530	MIMAT0020337	cel-miR-246-5p
20500531	MIMAT0000302	cel-miR-246-3p
20500532	MIMAT0015119	cel-miR-247-5p
20500533	MIMAT0000303	cel-miR-247-3p
20500534	MIMAT0000304	cel-miR-248
20500535	MIMAT0020338	cel-miR-249-5p
20500536	MIMAT0000305	cel-miR-249-3p
20500537	MIMAT0020339	cel-miR-250-5p
20500538	MIMAT0000306	cel-miR-250-3p
20500539	MIMAT0000307	cel-miR-251
20500540	MIMAT0000308	cel-miR-252-5p
20500541	MIMAT0020340	cel-miR-252-3p
20500542	MIMAT0000309	cel-miR-253-5p
20500543	MIMAT0004215	cel-miR-253-3p
20500544	MIMAT0000310	cel-miR-254
20500545	MIMAT0020341	cel-miR-255-5p
20500546	MIMAT0004216	cel-miR-255-3p
20500547	MIMAT0000311	cel-miR-256
20500548	MIMAT0000312	cel-miR-257
20500549	MIMAT0000313	cel-miR-258
20500550	MIMAT0000314	cel-miR-259-5p
20500551	MIMAT0020342	cel-miR-259-3p
20500552	MIMAT0000315	cel-miR-260
20500553	MIMAT0000316	cel-miR-261
20500554	MIMAT0000317	cel-miR-262
20500555	MIMAT0004571	hsa-miR-200b-5p
		hsa-miR-200b-5p
20500556	MIMAT0000318	hsa-miR-200b-3p
		hsa-miR-200b-3p
20500557	MIMAT0000319	dme-miR-263a-5p
20500558	MIMAT0020799	dme-miR-263a-3p
20500559	MIMAT0000320	cel-miR-264
20500560	MIMAT0000321	cel-miR-265
20500561	MIMAT0000322	cel-miR-266
20500562	MIMAT0000323	cel-miR-267
20500563	MIMAT0000324	cel-miR-268
20500564	MIMAT0000325	cel-miR-269
20500565	MIMAT0000326	cel-miR-270
20500566	MIMAT0000327	cel-miR-271
20500567	MIMAT0000328	cel-miR-272
20500568	MIMAT0000329	cel-miR-273
20500569	MIMAT0000330	dme-miR-184-5p
20500570	MIMAT0000331	dme-miR-184-3p
20500571	MIMAT0000332	dme-miR-274-5p
20500572	MIMAT0020800	dme-miR-274-3p
20500573	MIMAT0020801	dme-miR-275-5p
20500574	MIMAT0000333	dme-miR-275-3p
20500575	MIMAT0020802	dme-miR-92a-5p
20500576	MIMAT0000334	dme-miR-92a-3p
20500577	MIMAT0000335	dme-miR-219-5p
20500578	MIMAT0020803	dme-miR-219-3p
20500579	MIMAT0000336	dme-miR-276a-5p
20500580	MIMAT0000337	dme-miR-276a-3p
20500581	MIMAT0020804	dme-miR-277-5p
20500582	MIMAT0000338	dme-miR-277-3p
20500583	MIMAT0020805	dme-miR-278-5p
20500584	MIMAT0000339	dme-miR-278-3p
20500585	MIMAT0020806	dme-miR-133-5p
20500586	MIMAT0000340	dme-miR-133-3p
20500587	MIMAT0020807	dme-miR-279-5p
20500588	MIMAT0000341	dme-miR-279-3p
20500589	MIMAT0000342	dme-miR-33-5p
20500590	MIMAT0020808	dme-miR-33-3p
20500591	MIMAT0000343	dme-miR-280-5p
20500592	MIMAT0000344	dme-miR-281-1-5p
20500593	MIMAT0000345	dme-miR-281-3p
20500594	MIMAT0000346	dme-miR-282-5p
20500595	MIMAT0020809	dme-miR-282-3p
20500596	MIMAT0000347	dme-miR-283-5p
20500597	MIMAT0020810	dme-miR-283-3p
20500598	MIMAT0020811	dme-miR-284-5p
20500599	MIMAT0000348	dme-miR-284-3p
20500600	MIMAT0000349	dme-miR-281-2-5p
20500601	MIMAT0000350	dme-miR-34-5p
20500602	MIMAT0020812	dme-miR-34-3p
20500603	MIMAT0020813	dme-miR-124-5p
20500604	MIMAT0000351	dme-miR-124-3p
20500605	MIMAT0020814	dme-miR-79-5p
20500606	MIMAT0000352	dme-miR-79-3p
20500607	MIMAT0020815	dme-miR-276b-5p
20500608	MIMAT0000354	dme-miR-276b-3p
20500609	MIMAT0020816	dme-miR-210-5p
20500610	MIMAT0000355	dme-miR-210-3p
20500611	MIMAT0020817	dme-miR-285-5p
20500612	MIMAT0000356	dme-miR-285-3p
20500613	MIMAT0000357	dme-miR-100-5p
20500614	MIMAT0020818	dme-miR-100-3p
20500615	MIMAT0020819	dme-miR-92b-5p
20500616	MIMAT0000358	dme-miR-92b-3p
20500617	MIMAT0020820	dme-miR-286-5p
20500618	MIMAT0000359	dme-miR-286-3p
20500619	MIMAT0000360	dme-miR-287-3p
20500620	MIMAT0020821	dme-miR-87-5p
20500621	MIMAT0000361	dme-miR-87-3p
20500622	MIMAT0000362	dme-miR-263b-5p
20500623	MIMAT0020822	dme-miR-263b-3p
20500624	MIMAT0000363	dme-miR-288-3p
20500625	MIMAT0000364	dme-miR-289-5p
20500626	MIMAT0020823	dme-bantam-5p
20500627	MIMAT0000365	dme-bantam-3p
20500628	MIMAT0000366	mmu-miR-290a-5p
		mmu-miR-290a-5p
20500629	MIMAT0004572	mmu-miR-290a-3p
20500630	MIMAT0000367	mmu-miR-291a-5p
		mmu-miR-291a-5p
20500631	MIMAT0000368	mmu-miR-291a-3p
20500632	MIMAT0000369	mmu-miR-292-5p
20500633	MIMAT0000370	mmu-miR-292-3p
20500634	MIMAT0004573	mmu-miR-293-5p
		mmu-miR-293-5p
20500635	MIMAT0000371	mmu-miR-293-3p
		mmu-miR-293-3p
20500636	MIMAT0004574	mmu-miR-294-5p
20500637	MIMAT0000372	mmu-miR-294-3p
		mmu-miR-294-3p
20500638	MIMAT0004575	mmu-miR-295-5p
20500639	MIMAT0000373	mmu-miR-295-3p
		mmu-miR-295-3p
20500640	MIMAT0000374	mmu-miR-296-5p
		mmu-miR-296-5p
20500641	MIMAT0004576	mmu-miR-296-3p
		mmu-miR-296-3p
20500642	MIMAT0000375	mmu-miR-297a-5p
		mmu-miR-297a-5p
20500643	MIMAT0000376	mmu-miR-298-5p
		mmu-miR-298-5p
20500644	MIMAT0017007	mmu-miR-298-3p
20500645	MIMAT0000377	mmu-miR-299a-5p
20500646	MIMAT0004577	mmu-miR-299a-3p
20500647	MIMAT0004578	mmu-miR-300-5p
20500648	MIMAT0000378	mmu-miR-300-3p
		mmu-miR-300-3p
20500649	MIMAT0017008	mmu-miR-301a-5p
20500650	MIMAT0000379	mmu-miR-301a-3p
		mmu-miR-301a-3p
20500651	MIMAT0004579	mmu-miR-302a-5p
		mmu-miR-302a-5p
20500652	MIMAT0000380	mmu-miR-302a-3p
		mmu-miR-302a-3p
20500653	MIMAT0000381	mmu-miR-34c-5p
		mmu-miR-34c-5p
20500654	MIMAT0004580	mmu-miR-34c-3p
		mmu-miR-34c-3p
20500655	MIMAT0000382	mmu-miR-34b-5p
		mmu-miR-34b-5p
20500656	MIMAT0004581	mmu-miR-34b-3p
		mmu-miR-34b-3p
20500657	MIMAT0000383	mmu-let-7d-5p
		mmu-let-7d-5p
20500658	MIMAT0000384	mmu-let-7d-3p
		mmu-let-7d-3p
20500659	MIMAT0000385	mmu-miR-106a-5p
		mmu-miR-106a-5p
20500660	MIMAT0017009	mmu-miR-106a-3p
20500661	MIMAT0000386	mmu-miR-106b-5p
		mmu-miR-106b-5p
20500662	MIMAT0004582	mmu-miR-106b-3p
20500663	MIMAT0004583	mmu-miR-130b-5p
20500664	MIMAT0000387	mmu-miR-130b-3p
		mmu-miR-130b-3p
20500665	MIMAT0000388	dme-miR-303-5p
20500666	MIMAT0020824	dme-miR-303-3p
20500667	MIMAT0000389	dme-miR-31b-5p
20500668	MIMAT0020825	dme-miR-31b-3p
20500669	MIMAT0000390	dme-miR-304-5p
20500670	MIMAT0020826	dme-miR-304-3p
20500671	MIMAT0000391	dme-miR-305-5p
20500672	MIMAT0020827	dme-miR-305-3p
20500673	MIMAT0000392	dme-miR-9c-5p
20500674	MIMAT0020828	dme-miR-9c-3p
20500675	MIMAT0000393	dme-miR-306-5p
20500676	MIMAT0000394	dme-miR-306-3p
20500677	MIMAT0000395	dme-miR-9b-5p
20500678	MIMAT0020829	dme-miR-9b-3p
20500679	MIMAT0000396	dme-let-7-5p
20500680	MIMAT0020830	dme-let-7-3p
20500681	MIMAT0000397	dme-miR-125-5p
20500682	MIMAT0020831	dme-miR-125-3p
20500683	MIMAT0020832	dme-miR-307a-5p
20500684	MIMAT0000398	dme-miR-307a-3p
20500685	MIMAT0020833	dme-miR-308-5p
20500686	MIMAT0000399	dme-miR-308-3p
20500687	MIMAT0000400	dme-miR-31a-5p
20500688	MIMAT0020834	dme-miR-31a-3p
20500689	MIMAT0020835	dme-miR-309-5p
20500690	MIMAT0000401	dme-miR-309-3p
20500691	MIMAT0020836	dme-miR-310-5p
20500692	MIMAT0000402	dme-miR-310-3p
20500693	MIMAT0020837	dme-miR-311-5p
20500694	MIMAT0000403	dme-miR-311-3p
20500695	MIMAT0020838	dme-miR-312-5p
20500696	MIMAT0000404	dme-miR-312-3p
20500697	MIMAT0020839	dme-miR-313-5p
20500698	MIMAT0000405	dme-miR-313-3p
20500699	MIMAT0020840	dme-miR-314-5p
20500700	MIMAT0000406	dme-miR-314-3p
20500701	MIMAT0000407	dme-miR-315-5p
20500702	MIMAT0020841	dme-miR-315-3p
20500703	MIMAT0000408	dme-miR-316-5p
20500704	MIMAT0020842	dme-miR-316-3p
20500705	MIMAT0020843	dme-miR-317-5p
20500706	MIMAT0000409	dme-miR-317-3p
20500707	MIMAT0020844	dme-miR-318-5p
20500708	MIMAT0000410	dme-miR-318-3p
20500709	MIMAT0020845	dme-miR-2c-5p
20500710	MIMAT0000411	dme-miR-2c-3p
20500711	MIMAT0000412	dme-miR-iab-4-5p
20500712	MIMAT0000413	dme-miR-iab-4-3p
20500713	MIMAT0000414	hsa-let-7g-5p
		hsa-let-7g-5p
20500714	MIMAT0004584	hsa-let-7g-3p
		hsa-let-7g-3p
20500715	MIMAT0000415	hsa-let-7i-5p
		hsa-let-7i-5p
20500716	MIMAT0004585	hsa-let-7i-3p
		hsa-let-7i-3p
20500717	MIMAT0000416	hsa-miR-1
		hsa-miR-1
20500718	MIMAT0000417	hsa-miR-15b-5p
		hsa-miR-15b-5p
20500719	MIMAT0004586	hsa-miR-15b-3p
		hsa-miR-15b-3p
20500720	MIMAT0004587	hsa-miR-23b-5p
20500721	MIMAT0000418	hsa-miR-23b-3p
		hsa-miR-23b-3p
20500722	MIMAT0004588	hsa-miR-27b-5p
		hsa-miR-27b-5p
20500723	MIMAT0000419	hsa-miR-27b-3p
		hsa-miR-27b-3p
20500724	MIMAT0000420	hsa-miR-30b-5p
20500725	MIMAT0004589	hsa-miR-30b-3p
		hsa-miR-30b-3p
20500726	MIMAT0000421	hsa-miR-122-5p
20500727	MIMAT0004590	hsa-miR-122-3p
20500728	MIMAT0004591	hsa-miR-124-5p
20500729	MIMAT0000422	hsa-miR-124-3p
		hsa-miR-124-3p
20500730	MIMAT0000423	hsa-miR-125b-5p
		hsa-miR-125b-5p
20500731	MIMAT0004592	hsa-miR-125b-1-3p
20500732	MIMAT0026477	hsa-miR-128-1-5p
20500733	MIMAT0000424	hsa-miR-128-3p
		hsa-miR-128-3p
20500734	MIMAT0004593	hsa-miR-130a-5p
		hsa-miR-130a-5p
20500735	MIMAT0000425	hsa-miR-130a-3p
		hsa-miR-130a-3p
20500736	MIMAT0004594	hsa-miR-132-5p
20500737	MIMAT0000426	hsa-miR-132-3p
		hsa-miR-132-3p
20500738	MIMAT0026478	hsa-miR-133a-5p
20500739	MIMAT0000427	hsa-miR-133a-3p
		hsa-miR-133a-3p
20500740	MIMAT0000428	hsa-miR-135a-5p
		hsa-miR-135a-5p
20500741	MIMAT0004595	hsa-miR-135a-3p
		hsa-miR-135a-3p
20500742	MIMAT0000429	hsa-miR-137
		hsa-miR-137
20500743	MIMAT0000430	hsa-miR-138-5p
		hsa-miR-138-5p
20500744	MIMAT0004596	hsa-miR-138-2-3p
		hsa-miR-138-2-3p
20500745	MIMAT0000431	hsa-miR-140-5p
		hsa-miR-140-5p
20500746	MIMAT0004597	hsa-miR-140-3p
		hsa-miR-140-3p
20500747	MIMAT0004598	hsa-miR-141-5p
		hsa-miR-141-5p
20500748	MIMAT0000432	hsa-miR-141-3p
20500749	MIMAT0000433	hsa-miR-142-5p
20500750	MIMAT0000434	hsa-miR-142-3p
		hsa-miR-142-3p
20500751	MIMAT0004599	hsa-miR-143-5p
20500752	MIMAT0000435	hsa-miR-143-3p
		hsa-miR-143-3p
20500753	MIMAT0004600	hsa-miR-144-5p
20500754	MIMAT0000436	hsa-miR-144-3p
		hsa-miR-144-3p
20500755	MIMAT0000437	hsa-miR-145-5p
		hsa-miR-145-5p
20500756	MIMAT0004601	hsa-miR-145-3p
		hsa-miR-145-3p
20500757	MIMAT0026479	hsa-miR-152-5p
20500758	MIMAT0000438	hsa-miR-152-3p
		hsa-miR-152-3p
20500759	MIMAT0000439	hsa-miR-153-3p
		hsa-miR-153-3p
20500760	MIMAT0026480	hsa-miR-153-5p
20500761	MIMAT0000440	hsa-miR-191-5p
		hsa-miR-191-5p
20500762	MIMAT0001618	hsa-miR-191-3p
20500763	MIMAT0000441	hsa-miR-9-5p
20500764	MIMAT0000442	hsa-miR-9-3p
20500765	MIMAT0000443	hsa-miR-125a-5p
		hsa-miR-125a-5p
20500766	MIMAT0004602	hsa-miR-125a-3p
		hsa-miR-125a-3p
20500767	MIMAT0004603	hsa-miR-125b-2-3p
		hsa-miR-125b-2-3p
20500768	MIMAT0000444	hsa-miR-126-5p
20500769	MIMAT0000445	hsa-miR-126-3p
20500770	MIMAT0004604	hsa-miR-127-5p
		hsa-miR-127-5p
20500771	MIMAT0000446	hsa-miR-127-3p
		hsa-miR-127-3p
20500772	MIMAT0004605	hsa-miR-129-2-3p
20500773	MIMAT0000447	hsa-miR-134-5p
		hsa-miR-134-5p
20500774	MIMAT0026481	hsa-miR-134-3p
20500775	MIMAT0000448	hsa-miR-136-5p
		hsa-miR-136-5p
20500776	MIMAT0004606	hsa-miR-136-3p
		hsa-miR-136-3p
20500777	MIMAT0004607	hsa-miR-138-1-3p
		hsa-miR-138-1-3p
20500778	MIMAT0000449	hsa-miR-146a-5p
		hsa-miR-146a-5p
20500779	MIMAT0004608	hsa-miR-146a-3p
		hsa-miR-146a-3p
20500780	MIMAT0000450	hsa-miR-149-5p
20500781	MIMAT0004609	hsa-miR-149-3p
20500782	MIMAT0000451	hsa-miR-150-5p
		hsa-miR-150-5p
20500783	MIMAT0004610	hsa-miR-150-3p
		hsa-miR-150-3p
20500784	MIMAT0000452	hsa-miR-154-5p
20500785	MIMAT0000453	hsa-miR-154-3p
		hsa-miR-154-3p
20500786	MIMAT0000454	hsa-miR-184
		hsa-miR-184
20500787	MIMAT0000455	hsa-miR-185-5p
		hsa-miR-185-5p
20500788	MIMAT0004611	hsa-miR-185-3p
20500789	MIMAT0000456	hsa-miR-186-5p
		hsa-miR-186-5p
20500790	MIMAT0004612	hsa-miR-186-3p
20500791	MIMAT0000457	hsa-miR-188-5p
		hsa-miR-188-5p
20500792	MIMAT0004613	hsa-miR-188-3p
		hsa-miR-188-3p
20500793	MIMAT0000458	hsa-miR-190a-5p
		hsa-miR-190a-5p
20500794	MIMAT0026482	hsa-miR-190a-3p
20500795	MIMAT0004614	hsa-miR-193a-5p
20500796	MIMAT0000459	hsa-miR-193a-3p
		hsa-miR-193a-3p
20500797	MIMAT0000460	hsa-miR-194-5p
		hsa-miR-194-5p
20500798	MIMAT0000461	hsa-miR-195-5p
		hsa-miR-195-5p
20500799	MIMAT0004615	hsa-miR-195-3p
20500800	MIMAT0000462	hsa-miR-206
		hsa-miR-206
20500801	MIMAT0000463	cbr-let-7
20500802	MIMAT0000464	cbr-lin-4
20500803	MIMAT0000465	cbr-miR-1
20500804	MIMAT0000466	cbr-miR-34
20500805	MIMAT0000467	cbr-miR-42
20500806	MIMAT0000468	cbr-miR-43
20500807	MIMAT0000469	cbr-miR-44
20500808	MIMAT0000470	cbr-miR-45
20500809	MIMAT0000471	cbr-miR-46
20500810	MIMAT0000472	cbr-miR-47
20500811	MIMAT0000473	cbr-miR-48
20500812	MIMAT0000474	cbr-miR-49
20500813	MIMAT0000475	cbr-miR-50
20500814	MIMAT0000476	cbr-miR-52
20500815	MIMAT0000477	cbr-miR-57
20500816	MIMAT0000478	cbr-miR-58
20500817	MIMAT0000479	cbr-miR-60
20500818	MIMAT0000480	cbr-miR-67
20500819	MIMAT0000481	cbr-miR-71
20500820	MIMAT0000482	cbr-miR-73a
20500821	MIMAT0000483	cbr-miR-74a
20500822	MIMAT0000484	cbr-miR-75
20500823	MIMAT0000485	cbr-miR-77
20500824	MIMAT0000486	cbr-miR-79
20500825	MIMAT0000487	cbr-miR-80
20500826	MIMAT0000488	cbr-miR-81
20500827	MIMAT0000489	cbr-miR-82
20500828	MIMAT0000490	cbr-miR-85
20500829	MIMAT0000491	cbr-miR-86
20500830	MIMAT0000492	cbr-miR-87
20500831	MIMAT0000493	cbr-miR-90a
20500832	MIMAT0000494	cbr-miR-124
20500833	MIMAT0000495	cbr-miR-228
20500834	MIMAT0000496	cbr-miR-230
20500835	MIMAT0000497	cbr-miR-232
20500836	MIMAT0000498	cbr-miR-233
20500837	MIMAT0000499	cbr-miR-234
20500838	MIMAT0000500	cbr-miR-236
20500839	MIMAT0000501	cbr-miR-241
20500840	MIMAT0000502	cbr-miR-244
20500841	MIMAT0000503	cbr-miR-245
20500842	MIMAT0000504	cbr-miR-248
20500843	MIMAT0000505	cbr-miR-250
20500844	MIMAT0000506	cbr-miR-251
20500845	MIMAT0000507	cbr-miR-252
20500846	MIMAT0000508	cbr-miR-259
20500847	MIMAT0000509	cbr-miR-268
20500848	MIMAT0000510	hsa-miR-320a
		hsa-miR-320a
20500849	MIMAT0000511	ath-miR319a
20500850	MIMAT0000512	ath-miR319b
20500851	MIMAT0017010	mmu-miR-19b-2-5p
20500852	MIMAT0000513	mmu-miR-19b-3p
20500853	MIMAT0000514	mmu-miR-30c-5p
		mmu-miR-30c-5p
20500854	MIMAT0004616	mmu-miR-30c-1-3p
		mmu-miR-30c-1-3p
20500855	MIMAT0005438	mmu-miR-30c-2-3p
		mmu-miR-30c-2-3p
20500856	MIMAT0000515	mmu-miR-30d-5p
		mmu-miR-30d-5p
20500857	MIMAT0017011	mmu-miR-30d-3p
20500858	MIMAT0004617	mmu-miR-148a-5p
		mmu-miR-148a-5p
20500859	MIMAT0000516	mmu-miR-148a-3p
		mmu-miR-148a-3p
20500860	MIMAT0000517	mmu-miR-192-5p
20500861	MIMAT0017012	mmu-miR-192-3p
20500862	MIMAT0000518	mmu-miR-196a-5p
		mmu-miR-196a-5p
20500863	MIMAT0017013	mmu-miR-196a-1-3p
20500864	MIMAT0004618	mmu-miR-196a-2-3p
20500865	MIMAT0004619	mmu-miR-200a-5p
		mmu-miR-200a-5p
20500866	MIMAT0000519	mmu-miR-200a-3p
20500867	MIMAT0017014	mmu-miR-208a-5p
20500868	MIMAT0000520	mmu-miR-208a-3p
		mmu-miR-208a-3p
20500869	MIMAT0000521	mmu-let-7a-5p
		mmu-let-7a-5p
20500870	MIMAT0004620	mmu-let-7a-1-3p
20500871	MIMAT0017015	mmu-let-7a-2-3p
20500872	MIMAT0000522	mmu-let-7b-5p
		mmu-let-7b-5p
20500873	MIMAT0004621	mmu-let-7b-3p
		mmu-let-7b-3p
20500874	MIMAT0000523	mmu-let-7c-5p
		mmu-let-7c-5p
20500875	MIMAT0004622	mmu-let-7c-1-3p
		mmu-let-7c-1-3p
20500876	MIMAT0005439	mmu-let-7c-2-3p
20500877	MIMAT0000524	mmu-let-7e-5p
		mmu-let-7e-5p
20500878	MIMAT0017016	mmu-let-7e-3p
20500879	MIMAT0000525	mmu-let-7f-5p
		mmu-let-7f-5p
20500880	MIMAT0004623	mmu-let-7f-1-3p
20500881	MIMAT0017017	mmu-let-7f-2-3p
20500882	MIMAT0000526	mmu-miR-15a-5p
		mmu-miR-15a-5p
20500883	MIMAT0004624	mmu-miR-15a-3p
		mmu-miR-15a-3p
20500884	MIMAT0000527	mmu-miR-16-5p
		mmu-miR-16-5p
20500885	MIMAT0004625	mmu-miR-16-1-3p
		mmu-miR-16-1-3p
20500886	MIMAT0017018	mmu-miR-16-2-3p
20500887	MIMAT0000528	mmu-miR-18a-5p
		mmu-miR-18a-5p
20500888	MIMAT0004626	mmu-miR-18a-3p
20500889	MIMAT0000529	mmu-miR-20a-5p
		mmu-miR-20a-5p
20500890	MIMAT0004627	mmu-miR-20a-3p
		mmu-miR-20a-3p
20500891	MIMAT0000530	mmu-miR-21a-5p
		mmu-miR-21a-5p
20500892	MIMAT0004628	mmu-miR-21a-3p
		mmu-miR-21a-3p
20500893	MIMAT0004629	mmu-miR-22-5p
		mmu-miR-22-5p
20500894	MIMAT0000531	mmu-miR-22-3p
		mmu-miR-22-3p
20500895	MIMAT0017019	mmu-miR-23a-5p
20500896	MIMAT0000532	mmu-miR-23a-3p
		mmu-miR-23a-3p
20500897	MIMAT0005440	mmu-miR-24-2-5p
		mmu-miR-24-2-5p
20500898	MIMAT0000533	mmu-miR-26a-5p
		mmu-miR-26a-5p
20500899	MIMAT0017020	mmu-miR-26a-1-3p
20500900	MIMAT0000534	mmu-miR-26b-5p
		mmu-miR-26b-5p
20500901	MIMAT0004630	mmu-miR-26b-3p
20500902	MIMAT0004631	mmu-miR-29a-5p
20500903	MIMAT0000535	mmu-miR-29a-3p
		mmu-miR-29a-3p
20500904	MIMAT0004632	mmu-miR-29c-5p
20500905	MIMAT0000536	mmu-miR-29c-3p
		mmu-miR-29c-3p
20500906	MIMAT0004633	mmu-miR-27a-5p
		mmu-miR-27a-5p
20500907	MIMAT0000537	mmu-miR-27a-3p
		mmu-miR-27a-3p
20500908	MIMAT0000538	mmu-miR-31-5p
20500909	MIMAT0004634	mmu-miR-31-3p
20500910	MIMAT0004635	mmu-miR-92a-2-5p
20500911	MIMAT0000539	mmu-miR-92a-3p
		mmu-miR-92a-3p
20500912	MIMAT0000540	mmu-miR-93-5p
		mmu-miR-93-5p
20500913	MIMAT0004636	mmu-miR-93-3p
		mmu-miR-93-3p
20500914	MIMAT0000541	mmu-miR-96-5p
		mmu-miR-96-5p
20500915	MIMAT0017021	mmu-miR-96-3p
20500916	MIMAT0000542	mmu-miR-34a-5p
		mmu-miR-34a-5p
20500917	MIMAT0017022	mmu-miR-34a-3p
20500918	MIMAT0000544	mmu-miR-129-2-3p
		mmu-miR-129-2-3p
20500919	MIMAT0000545	mmu-miR-98-5p
		mmu-miR-98-5p
20500920	MIMAT0017023	mmu-miR-98-3p
20500921	MIMAT0017024	mmu-miR-103-1-5p
20500922	MIMAT0000546	mmu-miR-103-3p
		mmu-miR-103-3p
20500923	MIMAT0017025	mmu-miR-103-2-5p
20500924	MIMAT0001619	rno-miR-322-5p
20500925	MIMAT0000547	rno-miR-322-3p
		rno-miR-322-3p
20500926	MIMAT0000548	mmu-miR-322-5p
20500927	MIMAT0000549	mmu-miR-322-3p
		mmu-miR-322-3p
20500928	MIMAT0004637	rno-miR-323-5p
		rno-miR-323-5p
20500929	MIMAT0000550	rno-miR-323-3p
		rno-miR-323-3p
20500930	MIMAT0004638	mmu-miR-323-5p
		mmu-miR-323-5p
20500931	MIMAT0000551	mmu-miR-323-3p
20500932	MIMAT0017026	rno-miR-301a-5p
20500933	MIMAT0000552	rno-miR-301a-3p
		rno-miR-301a-3p
20500934	MIMAT0000553	rno-miR-324-5p
		rno-miR-324-5p
20500935	MIMAT0000554	rno-miR-324-3p
		rno-miR-324-3p
20500936	MIMAT0000555	mmu-miR-324-5p
		mmu-miR-324-5p
20500937	MIMAT0000556	mmu-miR-324-3p
		mmu-miR-324-3p
20500938	MIMAT0000557	rno-miR-325-5p
		rno-miR-325-5p
20500939	MIMAT0004639	rno-miR-325-3p
		rno-miR-325-3p
20500940	MIMAT0000558	mmu-miR-325-5p
20500941	MIMAT0004640	mmu-miR-325-3p
20500942	MIMAT0017027	mmu-miR-326-5p
20500943	MIMAT0000559	mmu-miR-326-3p
		mmu-miR-326-3p
20500944	MIMAT0017028	rno-miR-326-5p
20500945	MIMAT0000560	rno-miR-326-3p
		rno-miR-326-3p
20500946	MIMAT0000561	rno-miR-327
		rno-miR-327
20500947	MIMAT0000562	rno-let-7d-5p
		rno-let-7d-5p
20500948	MIMAT0000563	rno-let-7d-3p
		rno-let-7d-3p
20500949	MIMAT0017029	rno-miR-328a-5p
20500950	MIMAT0000564	rno-miR-328a-3p
		rno-miR-328a-3p
20500951	MIMAT0017030	mmu-miR-328-5p
20500952	MIMAT0000565	mmu-miR-328-3p
		mmu-miR-328-3p
20500953	MIMAT0017031	rno-miR-329-5p
20500954	MIMAT0000566	rno-miR-329-3p
		rno-miR-329-3p
20500955	MIMAT0017032	mmu-miR-329-5p
20500956	MIMAT0000567	mmu-miR-329-3p
20500957	MIMAT0004641	rno-miR-330-5p
20500958	MIMAT0000568	rno-miR-330-3p
		rno-miR-330-3p
20500959	MIMAT0004642	mmu-miR-330-5p
20500960	MIMAT0000569	mmu-miR-330-3p
20500961	MIMAT0017033	rno-miR-331-5p
20500962	MIMAT0000570	rno-miR-331-3p
		rno-miR-331-3p
20500963	MIMAT0004643	mmu-miR-331-5p
20500964	MIMAT0000571	mmu-miR-331-3p
		mmu-miR-331-3p
20500965	MIMAT0000573	rno-miR-140-5p
20500966	MIMAT0000574	rno-miR-140-3p
		rno-miR-140-3p
20500967	MIMAT0000575	rno-miR-335
20500968	MIMAT0000576	rno-miR-336-5p
		rno-miR-336-5p
20500969	MIMAT0017034	rno-miR-336-3p
20500970	MIMAT0017035	rno-miR-337-5p
20500971	MIMAT0000577	rno-miR-337-3p
		rno-miR-337-3p
20500972	MIMAT0004644	mmu-miR-337-5p
		mmu-miR-337-5p
20500973	MIMAT0000578	mmu-miR-337-3p
		mmu-miR-337-3p
20500974	MIMAT0004645	rno-miR-148b-5p
		rno-miR-148b-5p
20500975	MIMAT0000579	rno-miR-148b-3p
		rno-miR-148b-3p
20500976	MIMAT0017036	mmu-miR-148b-5p
20500977	MIMAT0000580	mmu-miR-148b-3p
20500978	MIMAT0004646	rno-miR-338-5p
		rno-miR-338-5p
20500979	MIMAT0000581	rno-miR-338-3p
		rno-miR-338-3p
20500980	MIMAT0004647	mmu-miR-338-5p
		mmu-miR-338-5p
20500981	MIMAT0000582	mmu-miR-338-3p
		mmu-miR-338-3p
20500982	MIMAT0000583	rno-miR-339-5p
20500983	MIMAT0004648	rno-miR-339-3p
		rno-miR-339-3p
20500984	MIMAT0000584	mmu-miR-339-5p
		mmu-miR-339-5p
20500985	MIMAT0004649	mmu-miR-339-3p
20500986	MIMAT0004650	rno-miR-340-5p
		rno-miR-340-5p
20500987	MIMAT0000585	rno-miR-340-3p
		rno-miR-340-3p
20500988	MIMAT0004651	mmu-miR-340-5p
		mmu-miR-340-5p
20500989	MIMAT0000586	mmu-miR-340-3p
		mmu-miR-340-3p
20500990	MIMAT0000587	rno-miR-341
		rno-miR-341
20500991	MIMAT0017037	mmu-miR-341-5p
20500992	MIMAT0000588	mmu-miR-341-3p
		mmu-miR-341-3p
20500993	MIMAT0004652	rno-miR-342-5p
		rno-miR-342-5p
20500994	MIMAT0000589	rno-miR-342-3p
		rno-miR-342-3p
20500995	MIMAT0004653	mmu-miR-342-5p
		mmu-miR-342-5p
20500996	MIMAT0000590	mmu-miR-342-3p
		mmu-miR-342-3p
20500997	MIMAT0000591	rno-miR-343
		rno-miR-343
20500998	MIMAT0004654	rno-miR-344a-5p
		rno-miR-344a-5p
20500999	MIMAT0000592	rno-miR-344a-3p
		rno-miR-344a-3p
20501000	MIMAT0017038	mmu-miR-344-5p
20501001	MIMAT0000593	mmu-miR-344-3p
		mmu-miR-344-3p
20501002	MIMAT0000594	rno-miR-345-5p
		rno-miR-345-5p
20501003	MIMAT0004655	rno-miR-345-3p
		rno-miR-345-3p
20501004	MIMAT0000595	mmu-miR-345-5p
20501005	MIMAT0004656	mmu-miR-345-3p
20501006	MIMAT0000596	rno-miR-346
		rno-miR-346
20501007	MIMAT0000597	mmu-miR-346-5p
		mmu-miR-346-5p
20501008	MIMAT0017039	mmu-miR-346-3p
20501009	MIMAT0000598	rno-miR-347
		rno-miR-347
20501010	MIMAT0000599	rno-miR-349
		rno-miR-349
20501011	MIMAT0000600	rno-miR-129-5p
		rno-miR-129-5p
20501012	MIMAT0000601	rno-miR-129-2-3p
20501013	MIMAT0000602	rno-miR-20a-5p
		rno-miR-20a-5p
20501014	MIMAT0000603	rno-miR-20a-3p
		rno-miR-20a-3p
20501015	MIMAT0000604	rno-miR-350
		rno-miR-350
20501016	MIMAT0017040	mmu-miR-350-5p
20501017	MIMAT0000605	mmu-miR-350-3p
		mmu-miR-350-3p
20501018	MIMAT0000606	rno-miR-7a-5p
		rno-miR-7a-5p
20501019	MIMAT0000607	rno-miR-7a-1-3p
		rno-miR-7a-1-3p
20501020	MIMAT0000608	rno-miR-351-5p
		rno-miR-351-5p
20501021	MIMAT0017041	rno-miR-351-3p
20501022	MIMAT0000609	mmu-miR-351-5p
20501023	MIMAT0017042	mmu-miR-351-3p
20501024	MIMAT0000610	rno-miR-352
		rno-miR-352
20501025	MIMAT0000611	rno-miR-135b-5p
		rno-miR-135b-5p
20501026	MIMAT0017043	rno-miR-135b-3p
20501027	MIMAT0000612	mmu-miR-135b-5p
		mmu-miR-135b-5p
20501028	MIMAT0017044	mmu-miR-135b-3p
20501029	MIMAT0000613	rno-miR-151-5p
20501030	MIMAT0000614	rno-miR-151-3p
20501031	MIMAT0017045	rno-miR-101b-5p
20501032	MIMAT0000615	rno-miR-101b-3p
		rno-miR-101b-3p
20501033	MIMAT0017046	mmu-miR-101b-5p
20501034	MIMAT0000616	mmu-miR-101b-3p
		mmu-miR-101b-3p
20501035	MIMAT0004657	hsa-miR-200c-5p
		hsa-miR-200c-5p
20501036	MIMAT0000617	hsa-miR-200c-3p
		hsa-miR-200c-3p
20501037	MIMAT0017047	mmu-miR-1a-2-5p
20501038	MIMAT0000618	osa-miR156a
20501039	MIMAT0000619	osa-miR156b-5p
20501040	MIMAT0022845	osa-miR156b-3p
20501041	MIMAT0000620	osa-miR156c-5p
20501042	MIMAT0022846	osa-miR156c-3p
20501043	MIMAT0000621	osa-miR156d
20501044	MIMAT0000622	osa-miR156e
20501045	MIMAT0000623	osa-miR156f-5p
20501046	MIMAT0022847	osa-miR156f-3p
20501047	MIMAT0000624	osa-miR156g-5p
20501048	MIMAT0022848	osa-miR156g-3p
20501049	MIMAT0031156	osa-miR156h-5p
20501050	MIMAT0031157	osa-miR156h-3p
20501051	MIMAT0000626	osa-miR156i
20501052	MIMAT0000627	osa-miR156j-5p
20501053	MIMAT0022850	osa-miR156j-3p
20501054	MIMAT0000628	osa-miR160a-5p
20501055	MIMAT0022851	osa-miR160a-3p
20501056	MIMAT0000629	osa-miR160b-5p
20501057	MIMAT0022852	osa-miR160b-3p
20501058	MIMAT0000630	osa-miR160c-5p
20501059	MIMAT0022853	osa-miR160c-3p
20501060	MIMAT0000631	osa-miR160d-5p
20501061	MIMAT0022854	osa-miR160d-3p
20501062	MIMAT0000632	osa-miR162a
20501063	MIMAT0000633	osa-miR164a
20501064	MIMAT0000634	osa-miR164b
20501065	MIMAT0022855	osa-miR166a-5p
20501066	MIMAT0000635	osa-miR166a-3p
20501067	MIMAT0022856	osa-miR166b-5p
20501068	MIMAT0000636	osa-miR166b-3p
20501069	MIMAT0022857	osa-miR166c-5p
20501070	MIMAT0000637	osa-miR166c-3p
20501071	MIMAT0022858	osa-miR166d-5p
20501072	MIMAT0000638	osa-miR166d-3p
20501073	MIMAT0022859	osa-miR166e-5p
20501074	MIMAT0000639	osa-miR166e-3p
20501075	MIMAT0000640	osa-miR166f
20501076	MIMAT0000641	osa-miR167a-5p
20501077	MIMAT0006780	osa-miR167a-3p
20501078	MIMAT0000642	osa-miR167b
20501079	MIMAT0000643	osa-miR167c-5p
20501080	MIMAT0022860	osa-miR167c-3p
20501081	MIMAT0000644	osa-miR169a
20501082	MIMAT0000645	osa-miR171a
20501083	MIMAT0000646	hsa-miR-155-5p
		hsa-miR-155-5p
20501084	MIMAT0004658	hsa-miR-155-3p
		hsa-miR-155-3p
20501085	MIMAT0017048	mmu-miR-107-5p
20501086	MIMAT0000647	mmu-miR-107-3p
		mmu-miR-107-3p
20501087	MIMAT0000648	mmu-miR-10a-5p
		mmu-miR-10a-5p
20501088	MIMAT0004659	mmu-miR-10a-3p
20501089	MIMAT0000649	mmu-miR-17-5p
		mmu-miR-17-5p
20501090	MIMAT0000650	mmu-miR-17-3p
		mmu-miR-17-3p
20501091	MIMAT0004660	mmu-miR-19a-5p
20501092	MIMAT0000651	mmu-miR-19a-3p
		mmu-miR-19a-3p
20501093	MIMAT0017049	mmu-miR-25-5p
20501094	MIMAT0000652	mmu-miR-25-3p
		mmu-miR-25-3p
20501095	MIMAT0000653	mmu-miR-28a-5p
		mmu-miR-28a-5p
20501096	MIMAT0004661	mmu-miR-28a-3p
		mmu-miR-28a-3p
20501097	MIMAT0000654	mmu-miR-32-5p
		mmu-miR-32-5p
20501098	MIMAT0017050	mmu-miR-32-3p
20501099	MIMAT0000655	mmu-miR-100-5p
		mmu-miR-100-5p
20501100	MIMAT0017051	mmu-miR-100-3p
20501101	MIMAT0000656	mmu-miR-139-5p
		mmu-miR-139-5p
20501102	MIMAT0004662	mmu-miR-139-3p
		mmu-miR-139-3p
20501103	MIMAT0004663	mmu-miR-200c-5p
		mmu-miR-200c-5p
20501104	MIMAT0000657	mmu-miR-200c-3p
		mmu-miR-200c-3p
20501105	MIMAT0017052	mmu-miR-210-5p
20501106	MIMAT0000658	mmu-miR-210-3p
		mmu-miR-210-3p
20501107	MIMAT0017053	mmu-miR-212-5p
20501108	MIMAT0000659	mmu-miR-212-3p
		mmu-miR-212-3p
20501109	MIMAT0000660	mmu-miR-181a-1-3p
		mmu-miR-181a-1-3p
20501110	MIMAT0004664	mmu-miR-214-5p
20501111	MIMAT0000661	mmu-miR-214-3p
		mmu-miR-214-3p
20501112	MIMAT0000662	mmu-miR-216a-5p
		mmu-miR-216a-5p
20501113	MIMAT0017054	mmu-miR-216a-3p
20501114	MIMAT0000663	mmu-miR-218-5p
		mmu-miR-218-5p
20501115	MIMAT0004665	mmu-miR-218-1-3p
		mmu-miR-218-1-3p
20501116	MIMAT0005444	mmu-miR-218-2-3p
20501117	MIMAT0000664	mmu-miR-219a-5p
		mmu-miR-219a-5p
20501118	MIMAT0017055	mmu-miR-219a-1-3p
20501119	MIMAT0017056	mmu-miR-223-5p
20501120	MIMAT0000665	mmu-miR-223-3p
		mmu-miR-223-3p
20501121	MIMAT0017057	mmu-miR-320-5p
20501122	MIMAT0000666	mmu-miR-320-3p
		mmu-miR-320-3p
20501123	MIMAT0017058	mmu-miR-26a-2-3p
20501124	MIMAT0000667	mmu-miR-33-5p
		mmu-miR-33-5p
20501125	MIMAT0004666	mmu-miR-33-3p
20501126	MIMAT0000668	mmu-miR-211-5p
		mmu-miR-211-5p
20501127	MIMAT0017059	mmu-miR-211-3p
20501128	MIMAT0017060	mmu-miR-221-5p
20501129	MIMAT0000669	mmu-miR-221-3p
		mmu-miR-221-3p
20501130	MIMAT0017061	mmu-miR-222-5p
20501131	MIMAT0000670	mmu-miR-222-3p
		mmu-miR-222-3p
20501132	MIMAT0000671	mmu-miR-224-5p
20501133	MIMAT0017062	mmu-miR-224-3p
20501134	MIMAT0017063	mmu-miR-29b-2-5p
20501135	MIMAT0000672	mmu-miR-199b-5p
		mmu-miR-199b-5p
20501136	MIMAT0004667	mmu-miR-199b-3p
20501137	MIMAT0017064	mmu-miR-135a-2-3p
20501138	MIMAT0017065	mmu-miR-19b-1-5p
20501139	MIMAT0017066	mmu-miR-92a-1-5p
20501140	MIMAT0004668	mmu-miR-138-1-3p
20501141	MIMAT0000673	mmu-miR-181b-5p
		mmu-miR-181b-5p
20501142	MIMAT0017067	mmu-miR-181b-1-3p
20501143	MIMAT0000674	mmu-miR-181c-5p
		mmu-miR-181c-5p
20501144	MIMAT0017068	mmu-miR-181c-3p
20501145	MIMAT0004669	mmu-miR-125b-1-3p
		mmu-miR-125b-1-3p
20501146	MIMAT0017069	mmu-miR-128-2-5p
20501147	MIMAT0031095	hsa-miR-128-2-5p
20501148	MIMAT0000677	mmu-miR-7a-5p
		mmu-miR-7a-5p
20501149	MIMAT0004670	mmu-miR-7a-1-3p
		mmu-miR-7a-1-3p
20501150	MIMAT0017070	mmu-miR-7a-2-3p
20501151	MIMAT0000678	mmu-miR-7b-5p
		mmu-miR-7b-5p
20501152	MIMAT0017071	mmu-miR-7b-3p
20501153	MIMAT0000679	mmu-miR-217-5p
20501154	MIMAT0017072	mmu-miR-217-3p
20501155	MIMAT0004671	hsa-miR-194-3p
20501156	MIMAT0017073	mmu-miR-194-2-3p
20501157	MIMAT0000680	hsa-miR-106b-5p
		hsa-miR-106b-5p
20501158	MIMAT0004672	hsa-miR-106b-3p
		hsa-miR-106b-3p
20501159	MIMAT0004673	hsa-miR-29c-5p
		hsa-miR-29c-5p
20501160	MIMAT0000681	hsa-miR-29c-3p
20501161	MIMAT0004674	hsa-miR-30c-1-3p
		hsa-miR-30c-1-3p
20501162	MIMAT0001620	hsa-miR-200a-5p
		hsa-miR-200a-5p
20501163	MIMAT0000682	hsa-miR-200a-3p
		hsa-miR-200a-3p
20501164	MIMAT0000683	hsa-miR-302a-5p
		hsa-miR-302a-5p
20501165	MIMAT0000684	hsa-miR-302a-3p
		hsa-miR-302a-3p
20501166	MIMAT0004675	hsa-miR-219a-2-3p
		hsa-miR-219a-2-3p
20501167	MIMAT0022841	mmu-miR-219a-2-3p
20501168	MIMAT0000685	hsa-miR-34b-5p
		hsa-miR-34b-5p
20501169	MIMAT0004676	hsa-miR-34b-3p
20501170	MIMAT0000686	hsa-miR-34c-5p
		hsa-miR-34c-5p
20501171	MIMAT0004677	hsa-miR-34c-3p
		hsa-miR-34c-3p
20501172	MIMAT0002890	hsa-miR-299-5p
20501173	MIMAT0000687	hsa-miR-299-3p
		hsa-miR-299-3p
20501174	MIMAT0022696	hsa-miR-301a-5p
20501175	MIMAT0000688	hsa-miR-301a-3p
		hsa-miR-301a-3p
20501176	MIMAT0000689	hsa-miR-99b-5p
		hsa-miR-99b-5p
20501177	MIMAT0004678	hsa-miR-99b-3p
		hsa-miR-99b-3p
20501178	MIMAT0000690	hsa-miR-296-5p
		hsa-miR-296-5p
20501179	MIMAT0004679	hsa-miR-296-3p
20501180	MIMAT0004680	hsa-miR-130b-5p
20501181	MIMAT0000691	hsa-miR-130b-3p
		hsa-miR-130b-3p
20501182	MIMAT0000692	hsa-miR-30e-5p
20501183	MIMAT0000693	hsa-miR-30e-3p
		hsa-miR-30e-3p
20501184	MIMAT0004681	hsa-miR-26a-2-3p
		hsa-miR-26a-2-3p
20501185	MIMAT0000694	cbr-miR-72
20501186	MIMAT0000695	cel-miR-353
20501187	MIMAT0000696	cel-miR-354
20501188	MIMAT0000697	cel-miR-355
20501189	MIMAT0000698	cel-miR-356a
20501190	MIMAT0020343	cel-miR-357-5p
20501191	MIMAT0000699	cel-miR-357-3p
20501192	MIMAT0015120	cel-miR-358-5p
20501193	MIMAT0000700	cel-miR-358-3p
20501194	MIMAT0000701	cel-miR-359
20501195	MIMAT0015121	cel-miR-360-5p
20501196	MIMAT0000702	cel-miR-360-3p
20501197	MIMAT0000703	hsa-miR-361-5p
		hsa-miR-361-5p
20501198	MIMAT0004682	hsa-miR-361-3p
		hsa-miR-361-3p
20501199	MIMAT0000704	mmu-miR-361-5p
20501200	MIMAT0017075	mmu-miR-361-3p
20501201	MIMAT0000705	hsa-miR-362-5p
		hsa-miR-362-5p
20501202	MIMAT0004683	hsa-miR-362-3p
		hsa-miR-362-3p
20501203	MIMAT0000706	mmu-miR-362-5p
		mmu-miR-362-5p
20501204	MIMAT0004684	mmu-miR-362-3p
		mmu-miR-362-3p
20501205	MIMAT0003385	hsa-miR-363-5p
		hsa-miR-363-5p
20501206	MIMAT0000707	hsa-miR-363-3p
		hsa-miR-363-3p
20501207	MIMAT0017076	mmu-miR-363-5p
20501208	MIMAT0000708	mmu-miR-363-3p
		mmu-miR-363-3p
20501209	MIMAT0009199	hsa-miR-365a-5p
20501210	MIMAT0000710	hsa-miR-365a-3p
		hsa-miR-365a-3p
20501211	MIMAT0017077	mmu-miR-365-1-5p
20501212	MIMAT0000711	mmu-miR-365-3p
		mmu-miR-365-3p
20501213	MIMAT0022833	hsa-miR-365b-5p
20501214	MIMAT0022834	hsa-miR-365b-3p
20501215	MIMAT0000714	hsa-miR-302b-5p
		hsa-miR-302b-5p
20501216	MIMAT0000715	hsa-miR-302b-3p
		hsa-miR-302b-3p
20501217	MIMAT0000716	hsa-miR-302c-5p
20501218	MIMAT0000717	hsa-miR-302c-3p
		hsa-miR-302c-3p
20501219	MIMAT0004685	hsa-miR-302d-5p
		hsa-miR-302d-5p
20501220	MIMAT0000718	hsa-miR-302d-3p
20501221	MIMAT0004686	hsa-miR-367-5p
20501222	MIMAT0000719	hsa-miR-367-3p
		hsa-miR-367-3p
20501223	MIMAT0022861	hsa-miR-376c-5p
20501224	MIMAT0000720	hsa-miR-376c-3p
		hsa-miR-376c-3p
20501225	MIMAT0001621	hsa-miR-369-5p
		hsa-miR-369-5p
20501226	MIMAT0000721	hsa-miR-369-3p
		hsa-miR-369-3p
20501227	MIMAT0026483	hsa-miR-370-5p
20501228	MIMAT0000722	hsa-miR-370-3p
		hsa-miR-370-3p
20501229	MIMAT0004687	hsa-miR-371a-5p
		hsa-miR-371a-5p
20501230	MIMAT0000723	hsa-miR-371a-3p
		hsa-miR-371a-3p
20501231	MIMAT0026484	hsa-miR-372-5p
20501232	MIMAT0000724	hsa-miR-372-3p
		hsa-miR-372-3p
20501233	MIMAT0000725	hsa-miR-373-5p
20501234	MIMAT0000726	hsa-miR-373-3p
		hsa-miR-373-3p
20501235	MIMAT0000727	hsa-miR-374a-5p
20501236	MIMAT0004688	hsa-miR-374a-3p
20501237	MIMAT0000728	hsa-miR-375
20501238	MIMAT0003386	hsa-miR-376a-5p
20501239	MIMAT0000729	hsa-miR-376a-3p
		hsa-miR-376a-3p
20501240	MIMAT0004689	hsa-miR-377-5p
20501241	MIMAT0000730	hsa-miR-377-3p
20501242	MIMAT0000731	hsa-miR-378a-5p
		hsa-miR-378a-5p
20501243	MIMAT0000732	hsa-miR-378a-3p
20501244	MIMAT0000733	hsa-miR-379-5p
		hsa-miR-379-5p
20501245	MIMAT0004690	hsa-miR-379-3p
20501246	MIMAT0000734	hsa-miR-380-5p
		hsa-miR-380-5p
20501247	MIMAT0000735	hsa-miR-380-3p
		hsa-miR-380-3p
20501248	MIMAT0022862	hsa-miR-381-5p
20501249	MIMAT0000736	hsa-miR-381-3p
		hsa-miR-381-3p
20501250	MIMAT0000737	hsa-miR-382-5p
		hsa-miR-382-5p
20501251	MIMAT0022697	hsa-miR-382-3p
20501252	MIMAT0000738	hsa-miR-383-5p
		hsa-miR-383-5p
20501253	MIMAT0026485	hsa-miR-383-3p
20501254	MIMAT0017078	mmu-miR-375-5p
20501255	MIMAT0000739	mmu-miR-375-3p
20501256	MIMAT0003387	mmu-miR-376a-5p
		mmu-miR-376a-5p
20501257	MIMAT0000740	mmu-miR-376a-3p
		mmu-miR-376a-3p
20501258	MIMAT0017079	mmu-miR-377-5p
20501259	MIMAT0000741	mmu-miR-377-3p
		mmu-miR-377-3p
20501260	MIMAT0000742	mmu-miR-378a-5p
		mmu-miR-378a-5p
20501261	MIMAT0003151	mmu-miR-378a-3p
20501262	MIMAT0000743	mmu-miR-379-5p
		mmu-miR-379-5p
20501263	MIMAT0017080	mmu-miR-379-3p
20501264	MIMAT0000744	mmu-miR-380-5p
		mmu-miR-380-5p
20501265	MIMAT0000745	mmu-miR-380-3p
		mmu-miR-380-3p
20501266	MIMAT0017081	mmu-miR-381-5p
20501267	MIMAT0000746	mmu-miR-381-3p
		mmu-miR-381-3p
20501268	MIMAT0000747	mmu-miR-382-5p
20501269	MIMAT0004691	mmu-miR-382-3p
		mmu-miR-382-3p
20501270	MIMAT0000748	mmu-miR-383-5p
		mmu-miR-383-5p
20501271	MIMAT0017082	mmu-miR-383-3p
20501272	MIMAT0000749	cel-lsy-6
20501273	MIMAT0004692	hsa-miR-340-5p
20501274	MIMAT0000750	hsa-miR-340-3p
20501275	MIMAT0004693	hsa-miR-330-5p
		hsa-miR-330-5p
20501276	MIMAT0000751	hsa-miR-330-3p
		hsa-miR-330-3p
20501277	MIMAT0026486	hsa-miR-328-5p
20501278	MIMAT0000752	hsa-miR-328-3p
20501279	MIMAT0004694	hsa-miR-342-5p
		hsa-miR-342-5p
20501280	MIMAT0000753	hsa-miR-342-3p
		hsa-miR-342-3p
20501281	MIMAT0004695	hsa-miR-337-5p
		hsa-miR-337-5p
20501282	MIMAT0000754	hsa-miR-337-3p
		hsa-miR-337-3p
20501283	MIMAT0004696	hsa-miR-323a-5p
		hsa-miR-323a-5p
20501284	MIMAT0000755	hsa-miR-323a-3p
20501285	MIMAT0000756	hsa-miR-326
		hsa-miR-326
20501286	MIMAT0004697	hsa-miR-151a-5p
		hsa-miR-151a-5p
20501287	MIMAT0000757	hsa-miR-151a-3p
20501288	MIMAT0000758	hsa-miR-135b-5p
		hsa-miR-135b-5p
20501289	MIMAT0004698	hsa-miR-135b-3p
		hsa-miR-135b-3p
20501290	MIMAT0004699	hsa-miR-148b-5p
		hsa-miR-148b-5p
20501291	MIMAT0000759	hsa-miR-148b-3p
20501292	MIMAT0004700	hsa-miR-331-5p
		hsa-miR-331-5p
20501293	MIMAT0000760	hsa-miR-331-3p
		hsa-miR-331-3p
20501294	MIMAT0000761	hsa-miR-324-5p
		hsa-miR-324-5p
20501295	MIMAT0000762	hsa-miR-324-3p
		hsa-miR-324-3p
20501296	MIMAT0004701	hsa-miR-338-5p
		hsa-miR-338-5p
20501297	MIMAT0000763	hsa-miR-338-3p
20501298	MIMAT0000764	hsa-miR-339-5p
20501299	MIMAT0004702	hsa-miR-339-3p
		hsa-miR-339-3p
20501300	MIMAT0000765	hsa-miR-335-5p
		hsa-miR-335-5p
20501301	MIMAT0004703	hsa-miR-335-3p
20501302	MIMAT0000766	mmu-miR-335-5p
		mmu-miR-335-5p
20501303	MIMAT0004704	mmu-miR-335-3p
20501304	MIMAT0000767	cbr-lsy-6
20501305	MIMAT0020344	cel-miR-392-5p
20501306	MIMAT0000768	cel-miR-392-3p
20501307	MIMAT0017083	mmu-miR-133b-5p
20501308	MIMAT0000769	mmu-miR-133b-3p
		mmu-miR-133b-3p
20501309	MIMAT0000770	hsa-miR-133b
20501310	MIMAT0017084	mmu-miR-181b-2-3p
20501311	MIMAT0000771	hsa-miR-325
20501312	MIMAT0000772	hsa-miR-345-5p
		hsa-miR-345-5p
20501313	MIMAT0022698	hsa-miR-345-3p
20501314	MIMAT0000773	hsa-miR-346
		hsa-miR-346
20501315	MIMAT0000774	rno-let-7a-5p
		rno-let-7a-5p
20501316	MIMAT0017085	rno-let-7a-1-3p
20501317	MIMAT0017086	rno-let-7a-2-3p
20501318	MIMAT0000775	rno-let-7b-5p
		rno-let-7b-5p
20501319	MIMAT0004705	rno-let-7b-3p
		rno-let-7b-3p
20501320	MIMAT0000776	rno-let-7c-5p
		rno-let-7c-5p
20501321	MIMAT0017087	rno-let-7c-1-3p
20501322	MIMAT0017088	rno-let-7c-2-3p
20501323	MIMAT0000777	rno-let-7e-5p
		rno-let-7e-5p
20501324	MIMAT0004706	rno-let-7e-3p
		rno-let-7e-3p
20501325	MIMAT0000778	rno-let-7f-5p
		rno-let-7f-5p
20501326	MIMAT0017089	rno-let-7f-1-3p
20501327	MIMAT0017090	rno-let-7f-2-3p
20501328	MIMAT0000779	rno-let-7i-5p
		rno-let-7i-5p
20501329	MIMAT0004707	rno-let-7i-3p
		rno-let-7i-3p
20501330	MIMAT0017091	rno-miR-7a-2-3p
20501331	MIMAT0000780	rno-miR-7b
		rno-miR-7b
20501332	MIMAT0000781	rno-miR-9a-5p
		rno-miR-9a-5p
20501333	MIMAT0004708	rno-miR-9a-3p
		rno-miR-9a-3p
20501334	MIMAT0000782	rno-miR-10a-5p
		rno-miR-10a-5p
20501335	MIMAT0004709	rno-miR-10a-3p
		rno-miR-10a-3p
20501336	MIMAT0000783	rno-miR-10b-5p
		rno-miR-10b-5p
20501337	MIMAT0017092	rno-miR-10b-3p
20501338	MIMAT0000784	rno-miR-15b-5p
		rno-miR-15b-5p
20501339	MIMAT0017093	rno-miR-15b-3p
20501340	MIMAT0000785	rno-miR-16-5p
		rno-miR-16-5p
20501341	MIMAT0017094	rno-miR-16-3p
20501342	MIMAT0000786	rno-miR-17-5p
20501343	MIMAT0004710	rno-miR-17-1-3p
		rno-miR-17-1-3p
20501344	MIMAT0000787	rno-miR-18a-5p
20501345	MIMAT0017095	rno-miR-18a-3p
20501346	MIMAT0017096	rno-miR-19b-1-5p
20501347	MIMAT0000788	rno-miR-19b-3p
		rno-miR-19b-3p
20501348	MIMAT0017097	rno-miR-19b-2-5p
20501349	MIMAT0017098	rno-miR-19a-5p
20501350	MIMAT0000789	rno-miR-19a-3p
20501351	MIMAT0000790	rno-miR-21-5p
		rno-miR-21-5p
20501352	MIMAT0004711	rno-miR-21-3p
		rno-miR-21-3p
20501353	MIMAT0003152	rno-miR-22-5p
		rno-miR-22-5p
20501354	MIMAT0000791	rno-miR-22-3p
		rno-miR-22-3p
20501355	MIMAT0004712	rno-miR-23a-5p
20501356	MIMAT0000792	rno-miR-23a-3p
		rno-miR-23a-3p
20501357	MIMAT0017099	rno-miR-23b-5p
20501358	MIMAT0000793	rno-miR-23b-3p
		rno-miR-23b-3p
20501359	MIMAT0003153	rno-miR-24-1-5p
		rno-miR-24-1-5p
20501360	MIMAT0000794	rno-miR-24-3p
		rno-miR-24-3p
20501361	MIMAT0005441	rno-miR-24-2-5p
		rno-miR-24-2-5p
20501362	MIMAT0004713	rno-miR-25-5p
		rno-miR-25-5p
20501363	MIMAT0000795	rno-miR-25-3p
		rno-miR-25-3p
20501364	MIMAT0000796	rno-miR-26a-5p
		rno-miR-26a-5p
20501365	MIMAT0017100	rno-miR-26a-3p
20501366	MIMAT0000797	rno-miR-26b-5p
		rno-miR-26b-5p
20501367	MIMAT0004714	rno-miR-26b-3p
		rno-miR-26b-3p
20501368	MIMAT0017101	rno-miR-27b-5p
20501369	MIMAT0000798	rno-miR-27b-3p
		rno-miR-27b-3p
20501370	MIMAT0004715	rno-miR-27a-5p
		rno-miR-27a-5p
20501371	MIMAT0000799	rno-miR-27a-3p
		rno-miR-27a-3p
20501372	MIMAT0000800	rno-miR-28-5p
20501373	MIMAT0004716	rno-miR-28-3p
20501374	MIMAT0004717	rno-miR-29b-2-5p
		rno-miR-29b-2-5p
20501375	MIMAT0000801	rno-miR-29b-3p
		rno-miR-29b-3p
20501376	MIMAT0004718	rno-miR-29a-5p
		rno-miR-29a-5p
20501377	MIMAT0000802	rno-miR-29a-3p
		rno-miR-29a-3p
20501378	MIMAT0005445	rno-miR-29b-1-5p
		rno-miR-29b-1-5p
20501379	MIMAT0003154	rno-miR-29c-5p
		rno-miR-29c-5p
20501380	MIMAT0000803	rno-miR-29c-3p
		rno-miR-29c-3p
20501381	MIMAT0000804	rno-miR-30c-5p
20501382	MIMAT0004719	rno-miR-30c-1-3p
20501383	MIMAT0000805	rno-miR-30e-5p
		rno-miR-30e-5p
20501384	MIMAT0004720	rno-miR-30e-3p
		rno-miR-30e-3p
20501385	MIMAT0000806	rno-miR-30b-5p
		rno-miR-30b-5p
20501386	MIMAT0004721	rno-miR-30b-3p
		rno-miR-30b-3p
20501387	MIMAT0000807	rno-miR-30d-5p
		rno-miR-30d-5p
20501388	MIMAT0004722	rno-miR-30d-3p
		rno-miR-30d-3p
20501389	MIMAT0000808	rno-miR-30a-5p
		rno-miR-30a-5p
20501390	MIMAT0000809	rno-miR-30a-3p
20501391	MIMAT0005442	rno-miR-30c-2-3p
		rno-miR-30c-2-3p
20501392	MIMAT0000810	rno-miR-31a-5p
		rno-miR-31a-5p
20501393	MIMAT0017102	rno-miR-31a-3p
20501394	MIMAT0000811	rno-miR-32-5p
		rno-miR-32-5p
20501395	MIMAT0017103	rno-miR-32-3p
20501396	MIMAT0000812	rno-miR-33-5p
20501397	MIMAT0017104	rno-miR-33-3p
20501398	MIMAT0000813	rno-miR-34b-5p
		rno-miR-34b-5p
20501399	MIMAT0017105	rno-miR-34b-3p
20501400	MIMAT0000814	rno-miR-34c-5p
		rno-miR-34c-5p
20501401	MIMAT0004723	rno-miR-34c-3p
		rno-miR-34c-3p
20501402	MIMAT0000815	rno-miR-34a-5p
		rno-miR-34a-5p
20501403	MIMAT0017106	rno-miR-34a-3p
20501404	MIMAT0017107	rno-miR-92a-1-5p
20501405	MIMAT0000816	rno-miR-92a-3p
		rno-miR-92a-3p
20501406	MIMAT0017108	rno-miR-92a-2-5p
20501407	MIMAT0000817	rno-miR-93-5p
		rno-miR-93-5p
20501408	MIMAT0017109	rno-miR-93-3p
20501409	MIMAT0000818	rno-miR-96-5p
		rno-miR-96-5p
20501410	MIMAT0017110	rno-miR-96-3p
20501411	MIMAT0000819	rno-miR-98-5p
20501412	MIMAT0017111	rno-miR-98-3p
20501413	MIMAT0000820	rno-miR-99a-5p
		rno-miR-99a-5p
20501414	MIMAT0004724	rno-miR-99a-3p
		rno-miR-99a-3p
20501415	MIMAT0000821	rno-miR-99b-5p
		rno-miR-99b-5p
20501416	MIMAT0004725	rno-miR-99b-3p
[truncated: 36,285 more rows]
