# Supplementary material for: Identification of a Transcription Factor-microRNA-Gene Coregulation Network in Meningioma through a Bioinformatic Analysis
Source: Biomed Res Int. 2020 Aug 7;2020:6353814. doi: 10.1155/2020/6353814 (PMC7428944; doi:10.1155/2020/6353814)
Supplement: Supplementary 3 — Supplemental Table 3: Eighty-six potential TFs of 235 DEGs predicted from the TRRUST database. [file 6353814.f3.xlsx]

## Sheet: Supplemental Table 1
Key TF	Description	# of overlapped genes	P value	Q value	List of overlapped genes
NFKB1	nuclear factor of kappa light polypeptide gene enhancer in B-cells 1	14	2.32e-05	0.00134	SERPINA3,CDH1,ATF3,SELE,CD74,AGT,PTGS2,VWF,IL6,CCL19,HIF1A,CXCL2,CCL2,MYC
ZEB2	zinc finger E-box binding homeobox 2	3	3.52e-05	0.00134	CDH1,MEOX2,CXADR
JUND	jun D proto-oncogene	5	5.48e-05	0.00134	IL6,PLAT,GADD45A,PTGS2,FOSL1
ATF4	activating transcription factor 4 (tax-responsive enhancer element B67)	5	6.33e-05	0.00134	PTGS2,ATF3,IL6,CCL2,DDIT4
RELA	v-rel reticuloendotheliosis viral oncogene homolog A (avian)	13	9.03e-05	0.00153	CCL19,IL6,PTGS2,MYC,CCL2,HIF1A,CXCL2,CD74,CDH1,VWF,AGT,SERPINA3,SELE
EGR2	early growth response 2	3	0.000144	0.00204	PTGS2,IL6,MPZ
SRF	serum response factor (c-fos serum response element-binding transcription factor)	4	0.000226	0.00274	MYL9,TAGLN,FOSL1,FHL2
JUN	jun proto-oncogene	8	0.000505	0.00536	FOSL1,PLAT,CCL2,ATF3,PTGS2,CA2,MYC,IL6
TBP	TATA box binding protein	3	0.000739	0.00698	MYC,IL6,PPBP
EZH2	enhancer of zeste homolog 2 (Drosophila)	4	0.00141	0.00952	SATB1,CDH1,ADAMTS1,MYC
KLF4	Kruppel-like factor 4 (gut)	4	0.00141	0.00952	IL6,TAGLN,ATF3,CDH1
RUNX1	runt-related transcription factor 1	4	0.00141	0.00952	CD34,MYL9,FHL2,CSF1R
ZNF300	zinc finger protein 300	2	0.00146	0.00952	MYC,IL6
TFAP2A	transcription factor AP-2 alpha (activating enhancer binding protein 2 alpha)	5	0.00178	0.0105	SNAP91,CRABP2,PTGS2,ADM,CDH1
STAT3	signal transducer and activator of transcription 3 (acute-phase response factor)	7	0.00184	0.0105	PTGS2,CDH1,MYC,IL6,S1PR1,HIF1A,CCL2
AHR	aryl hydrocarbon receptor	3	0.00235	0.0117	IL6,MYC,MT2A
REL	v-rel reticuloendotheliosis viral oncogene homolog (avian)	3	0.00235	0.0117	IL6,CCL2,SELE
SIRT1	sirtuin 1	4	0.00279	0.0132	MYC,CDH1,SELE,HIF1A
CEBPA	CCAAT/enhancer binding protein (C/EBP), alpha	4	0.00348	0.0156	S100A9,MYC,IL6,CCL2
ZFP36	ZFP36 ring finger protein	2	0.00398	0.0165	IL6,HIF1A
HDAC2	histone deacetylase 2	3	0.00426	0.0165	CDH1,CCL2,MYC
NFIC	nuclear factor I/C (CCAAT-binding transcription factor)	3	0.00426	0.0165	FHL5,CCL2,VWF
EP300	E1A binding protein p300	4	0.00488	0.0176	PTGS2,S100A4,MYC,IL6
CREB1	cAMP responsive element binding protein 1	5	0.00497	0.0176	PLAT,NMNAT2,SLC20A1,IL6,PTGS2
CEBPB	CCAAT/enhancer binding protein (C/EBP), beta	4	0.00624	0.0198	IL6,ADM,S100A9,PTGS2
NFIL3	nuclear factor, interleukin 3 regulated	2	0.00629	0.0198	VWF,PTGS2
SNAI1	snail homolog 1 (Drosophila)	2	0.00629	0.0198	CXADR,CDH1
ATF2	activating transcription factor 2	3	0.00691	0.021	ATF3,PTGS2,PLAT
STAT2	signal transducer and activator of transcription 2, 113kDa	2	0.00763	0.0216	PTGS2,CCL2
STAT4	signal transducer and activator of transcription 4	2	0.00763	0.0216	S100A4,MYC
APC	adenomatous polyposis coli	2	0.00908	0.0249	PTGS2,MYC
KLF5	Kruppel-like factor 5 (intestinal)	2	0.0106	0.0274	MYH11,HIF1A
ZEB1	zinc finger E-box binding homeobox 1	2	0.0106	0.0274	CDH1,CXADR
PPARA	peroxisome proliferator-activated receptor alpha	3	0.012	0.0283	IL6,PTGS2,FABP4
NF1	neurofibromin 1	2	0.0123	0.0283	PLAT,MYC
SNAI2	snail homolog 2 (Drosophila)	2	0.0123	0.0283	CDH1,CXADR
TCF3	transcription factor 3	2	0.0123	0.0283	CDH1,MYC
HOXA10	homeobox A10	2	0.0141	0.0307	EMX2,PHGDH
PTTG1	pituitary tumor-transforming 1	2	0.0141	0.0307	S100A4,MYC
VDR	vitamin D (1,25- dihydroxyvitamin D3) receptor	3	0.0146	0.0311	CDH1,IL6,DDIT4
CEBPD	CCAAT/enhancer binding protein (C/EBP), delta	2	0.018	0.0355	C3,PTGS2
FOXM1	forkhead box M1	2	0.018	0.0355	CDH1,MYC
HMGA1	high mobility group AT-hook 1	2	0.018	0.0355	PTGS2,CDH1
XBP1	X-box binding protein 1	2	0.0223	0.043	CCL2,IL6
EGR1	early growth response 1	4	0.0229	0.0433	ATF3,HIF1A,IL6,PTGS2
KLF6	Kruppel-like factor 6	2	0.0245	0.0453	CDH1,ATF3
CTNNB1	catenin (cadherin-associated protein), beta 1, 88kDa	2	0.0293	0.0531	PTGS2,MYC
SP1	Sp1 transcription factor	11	0.0312	0.0552	MMRN1,AGT,CCL2,IL6,PHGDH,PTGS2,MYC,SLC13A4,SLC7A5,PLAT,CXADR
BRCA1	breast cancer 1, early onset	3	0.0327	0.0553	HIF1A,MYC,GADD45A
FOXO1	forkhead box O1	2	0.0345	0.0553	FABP4,IL6
HDAC3	histone deacetylase 3	2	0.0345	0.0553	MYC,CDH1
MTA1	metastasis associated 1	2	0.0345	0.0553	MYC,CDH1
POU5F1	POU class 5 homeobox 1	2	0.0345	0.0553	GADD45A,BMP4
CREBBP	CREB binding protein	2	0.0372	0.0555	PTGS2,S100A4
CREM	cAMP responsive element modulator	2	0.0372	0.0555	FHL5,PLAT
PGR	progesterone receptor	2	0.0372	0.0555	PTGS2,MYC
TWIST2	twist basic helix-loop-helix transcription factor 2	2	0.0372	0.0555	SRPX,CDH1
MITF	microphthalmia-associated transcription factor	2	0.04	0.0572	CTSK,HIF1A
NR1I2	nuclear receptor subfamily 1, group I, member 2	2	0.04	0.0572	FOSL1,CCL2
SPI1	spleen focus forming virus (SFFV) proviral integration oncogene spi1	3	0.0404	0.0572	CCL2,JCHAIN,CTSK
ERG	v-ets erythroblastosis virus E26 oncogene homolog (avian)	2	0.0429	0.0597	ADAMTS1,VWF
PPARG	peroxisome proliferator-activated receptor gamma	3	0.0472	0.0647	PTGS2,MYC,FABP4
YBX1	Y box binding protein 1	2	0.0519	0.07	AGT,CDH1
RB1	retinoblastoma 1	2	0.055	0.0731	MYC,CDH1
ETS2	v-ets erythroblastosis virus E26 oncogene homolog 2 (avian)	2	0.0582	0.075	VWF,MYC
REST	RE1-silencing transcription factor	2	0.0582	0.075	SCG3,TAC1
TWIST1	twist basic helix-loop-helix transcription factor 1	2	0.0682	0.0865	CDH1,SRPX
STAT6	signal transducer and activator of transcription 6, interleukin-4 induced	2	0.0717	0.0896	SELE,PTGS2
MYB	v-myb myeloblastosis viral oncogene homolog (avian)	2	0.0752	0.0926	CD34,MYC
POU2F1	POU class 2 homeobox 1	2	0.0787	0.0956	VWF,GADD45A
STAT1	signal transducer and activator of transcription 1, 91kDa	3	0.084	0.101	IL6,CCL2,PTGS2
YY1	YY1 transcription factor	3	0.101	0.119	VWF,HIF1A,MYC
AR	androgen receptor	3	0.106	0.123	CDH1,MYC,PTGS2
USF2	upstream transcription factor 2, c-fos interacting	2	0.113	0.13	PTGS2,HIF1A
TP53	tumor protein p53	4	0.142	0.161	S100B,MYC,ATF3,GADD45A
FOS	FBJ murine osteosarcoma viral oncogene homolog	2	0.154	0.17	PTGS2,MYC
WT1	Wilms tumor 1	2	0.154	0.17	MYC,CDH1
USF1	upstream transcription factor 1	2	0.189	0.206	PTGS2,AGT
HDAC1	histone deacetylase 1	2	0.216	0.232	CDH1,PTGS2
E2F1	E2F transcription factor 1	3	0.226	0.24	MT1G,NELL2,MYC
ESR1	estrogen receptor 1	2	0.238	0.25	MYC,CDH1
ETS1	v-ets erythroblastosis virus E26 oncogene homolog 1 (avian)	2	0.252	0.261	VWF,BMP4
HIF1A	hypoxia inducible factor 1, alpha subunit (basic helix-loop-helix transcription factor)	2	0.27	0.277	CDH1,HIF1A
MYC	v-myc myelocytomatosis viral oncogene homolog (avian)	2	0.347	0.351	ATF3,IL6
SP3	Sp3 transcription factor	2	0.404	0.404	ALPL,PLAT
